1 ***The gammaherpesviral TATA-box-binding protein directly interacts with the CTD of host***  
2 ***RNA Pol II to direct late gene transcription***

3  
4 Angelica F. Castañeda<sup>a,1</sup>, Allison L. Didychuk<sup>a,1</sup>, Robert K. Louder<sup>b,c,2</sup>, Chloe O. McCollum<sup>d</sup>, Zoe  
5 H. Davis<sup>e</sup>, Eva Nogales<sup>b,d,f,g</sup>, Britt A. Glaunsinger<sup>a,d,f,g,3</sup>

6  
7 <sup>a</sup>Department of Plant and Microbial Biology, University of California, Berkeley, CA 94720;

8 <sup>b</sup>Molecular Biophysics and Integrative Bio-Imaging Division, Lawrence Berkeley National

9 Laboratory, Berkeley, CA 94720; <sup>c</sup>Biophysics Graduate Group, University of California,

10 Berkeley, CA 94720; <sup>d</sup>Department of Molecular and Cell Biology, University of California

11 Berkeley, CA 94720; <sup>e</sup>Division of Infectious Diseases and Immunity, School of Public Health,

12 University of California, Berkeley, CA 94720; <sup>f</sup>California Institute for Quantitative Biosciences

13 (QB3), University of California, Berkeley, CA 94720; <sup>g</sup>Howard Hughes Medical Institute,

14 Berkeley, CA 94720

15

16 <sup>1</sup>These authors contributed equally to this work

17 <sup>2</sup>Present address: Department of Biology, Johns Hopkins University, Baltimore, MD 21218

18 <sup>3</sup>To whom correspondence may be addressed. **Email:** [glaunsinger@berkeley.edu](mailto:glaunsinger@berkeley.edu)

19

20 **Classification**

21 Biological Sciences (Microbiology)

22

23 **Keywords**

24 Herpesvirus, KSHV, transcription, RNA polymerase II, late gene

25

26 **Author Contributions**

27 A.F.C., A.L.D., R.K.L., Z.H.D., E.N., and B.A.G. designed research; A.F.C., A.L.D., R.K.L., and

28 C.O.M. performed research; A.F.C., A.L.D., R.K.L., C.O.M., Z.H.D., E.N., and B.A.G. analyzed

29 data; and A.F.C., A.L.D., R.K.L., C.O.M., Z.H.D., E.N., and B.A.G. wrote the paper.

30

31 **This PDF file includes:**

32 Main Text

33 Figures 1 to 5

34

35 **ABSTRACT**

36  $\beta$ - and  $\gamma$ -herpesviruses include the oncogenic human viruses Kaposi's sarcoma-  
37 associated virus (KSHV) and Epstein-Barr virus (EBV), and human cytomegalovirus (HCMV),  
38 which is a significant cause of congenital disease. Near the end of their replication cycle, these  
39 viruses transcribe their late genes in a manner distinct from host transcription. Late gene  
40 transcription requires six virally-encoded proteins, one of which is a functional mimic of host  
41 TATA-box-binding protein (TBP) that is also involved in recruitment of RNA polymerase II (Pol  
42 II) via unknown mechanisms. Here, we applied biochemical protein interaction studies together  
43 with electron microscopy-based imaging of a reconstituted human preinitiation complex to  
44 define the mechanism underlying Pol II recruitment. These data revealed that the herpesviral  
45 TBP, encoded by ORF24 in KSHV, makes a direct protein-protein contact with the C-terminal  
46 domain of host RNA polymerase II (Pol II), which is a unique feature that functionally  
47 distinguishes viral from cellular TBP. The interaction is mediated by the N-terminal domain  
48 (NTD) of ORF24 through a conserved motif that is shared in its  $\beta$ - and  $\gamma$ -herpesvirus homologs.  
49 Thus, these herpesviruses employ an unprecedented strategy in eukaryotic transcription,  
50 wherein promoter recognition and polymerase recruitment are facilitated by a single  
51 transcriptional activator with functionally distinct domains.

52

53 **SIGNIFICANCE STATEMENT**

54 The  $\beta$ - and  $\gamma$ -herpesviruses mediate their late gene transcription through a set of viral  
55 transcriptional activators (vTAs). One of these vTAs, ORF24 in Kaposi's sarcoma-associated  
56 herpesvirus (KSHV), is a mimic of host TATA-box-binding protein (TBP). We demonstrate that  
57 the N-terminal domain of ORF24 and its homologs from other  $\beta$ - and  $\gamma$ -herpesviruses directly  
58 bind the unstructured C-terminal domain (CTD) of RNA Pol II. This functionally distinguishes the  
59 viral TBP mimic from cellular TBP, which does not bind Pol II. Thus, herpesviruses encode a  
60 transcription factor that has the dual ability to directly interact with promoter DNA and the

61 polymerase, a property which is unique in eukaryotic transcription and is conceptually akin to  
62 prokaryotic transcription factors.

63

## 64 **MAIN TEXT**

### 65 **INTRODUCTION**

66 Eukaryotic transcription begins with the formation of a pre-initiation complex (PIC) at the  
67 core promoter, starting with binding of TFIID and deployment of TATA-box-binding protein  
68 (TBP) onto the TATA box or pseudo-TATA box region upstream of the transcription start site  
69 (TSS). This is followed by recruitment of the other general transcription factors (GTFs), which  
70 recruit and position the 12-subunit RNA polymerase II (Pol II) at the core promoter (1). The  
71 largest Pol II subunit, Rpb1, has a low-complexity carboxyl terminal domain (CTD) that in  
72 humans is composed of 52 heptapeptide repeats with a consensus sequence of YSPTSPS. The  
73 CTD is a regulatory hub responsible for coordinating signals throughout the different stages of  
74 transcription and RNA processing (2). The phosphorylation state of the CTD controls  
75 progression through different states of transcription, as well as interactions with other cellular  
76 machinery (2, 3). Pol II with a hypophosphorylated CTD is recruited into the PIC (4), and  
77 phosphorylation signals release from the PIC into an elongating complex.

78 DNA viruses hijack the host transcriptional machinery to direct their own gene  
79 expression. Given that the mechanisms governing transcription from viral promoters are often  
80 similar to those at host promoters, viruses have been invaluable models for understanding  
81 transcription complex assembly and regulation (5-7). A conserved feature of double-stranded  
82 DNA (dsDNA) viruses is the temporal cascade of gene expression that begins with the  
83 expression of two classes of early genes, followed by viral DNA replication, and ending with the  
84 expression of late genes. In the  $\beta$ - and  $\gamma$ -herpesviruses, immediate early and early genes are  
85 transcribed in a manner similar to host genes. In contrast, the mechanism underlying the

86 regulation of late gene transcription remains poorly understood, yet is known to be distinct from  
87 host and early viral gene transcription.

88 Late gene transcription in the  $\beta$ - and  $\gamma$ -herpesviruses is divergent from that of the  $\alpha$ -  
89 herpesviruses and has a number of unique features. First,  $\beta/\gamma$  late gene transcription is  
90 regulated in part by a core promoter sequence 12-15 base pairs in length that has a TATT motif  
91 followed by a RVNYS motif in lieu of the canonical TATA box found in early viral promoters and  
92 in some cellular promoters (8-11). Additionally, late gene expression requires at least six viral  
93 proteins, called viral transcriptional activators (vTAs), which form a complex at late gene  
94 promoters (12-17). Little is known about the functional role these vTAs play in late gene  
95 transcription.

96 The best studied protein in the vTA complex is a virally-encoded TBP mimic (vTBP),  
97 encoded by ORF24 in the  $\gamma$ -herpesvirus Kaposi's sarcoma-associated herpesvirus (KSHV).  
98 ORF24 is predicted to have a TBP-like domain in the central portion of the protein, which was  
99 identified through an *in silico* protein fold threading analysis performed with BcRF1, the homolog  
100 of ORF24 from Epstein-Barr virus (18). Indeed, ORF24 replaces TBP at late gene promoters  
101 during infection, and a virus with mutations in the predicted DNA-binding residues in the TBP-  
102 like domain of ORF24 is unable to transcribe late genes (19). Thus,  $\beta$ - and  $\gamma$ -herpesviruses  
103 encode their own vTBP, which promotes efficient transcription from a distinct set of late gene  
104 promoters.

105 While both cellular TBP and ORF24 (vTBP) bind DNA, a unique feature of vTBP is that  
106 co-immunoprecipitation experiments revealed it additionally interacts with Pol II in cells (12, 19).  
107 In host transcription, recruitment of Pol II to promoters is mediated by TFIIB instead of a direct  
108 protein-protein interaction between TBP and Pol II (20, 21). While other viral proteins have been  
109 shown to directly or indirectly bind the Pol II CTD (22-24), none are thought to also bind  
110 promoter DNA. In contrast, prokaryotic transcription is dependent on sigma factors that facilitate  
111 both promoter selection and polymerase recruitment (25). We were therefore intrigued by the

112 possibility that vTBP is a unique bifunctional eukaryotic transcriptional activator and sought to  
113 understand the basis of its ability to recruit Pol II.

114 Here, we demonstrate that interaction with Pol II is conserved across the ORF24  $\beta$ - and  
115  $\gamma$ -herpesvirus homologs and is mediated through a conserved motif in the N-terminus. We  
116 identified a minimal N-terminal domain (NTD) that is sufficient for interaction with Pol II. Using  
117 recombinantly expressed protein, we demonstrate that ORF24 makes a direct protein-protein  
118 contact with the CTD of Pol II. Using pulldown assays and an *in vitro* reconstituted PIC  
119 assembly assay coupled with negative stain electron microscopy, we determined that ORF24-  
120 NTD directly interacts with the Pol II CTD, and demonstrate that at least four heptapeptide CTD  
121 repeats are required for this interaction. These findings suggest that vTBP is a fundamentally  
122 unique protein when compared to other eukaryotic Pol II-interacting proteins, as it both directly  
123 interacts with the Pol II CTD and binds promoter DNA to coordinate late gene expression.

124

## 125 **RESULTS**

### 126 **A leucine-rich motif is necessary for interaction with RNA polymerase II across $\beta$ - and $\gamma$ -** 127 **herpesviruses**

128 We previously revealed that KSHV ORF24 co-immunoprecipitates with Pol II in cells, in  
129 a manner dependent on three conserved leucine residues (L73-75; the RLLLG motif) in the N-  
130 terminus of ORF24 (19).  $\beta$ - and  $\gamma$ -herpesviral homologs of ORF24 from murine  
131 gammaherpesvirus 68 (MHV68; mu24), Epstein-Barr virus (EBV; BcRF1), and human  
132 cytomegalovirus (HCMV; UL87) have also been reported to interact with Pol II in cells (12, 19,  
133 26). While this interaction requires no other viral proteins, how it is orchestrated remains a  
134 central open question. For example, it is unknown whether Pol II binding occurs through an  
135 ORF24 domain separable from the region required for binding the ORF34 vTA (which links  
136 ORF24 to the rest of the late gene transcription complex (14)) and/or the region required for  
137 binding to promoter DNA. Furthermore, it is not known whether ORF24 binds Pol II directly or

138 indirectly via bridging cellular factors - as is the case for all other eukaryotic promoter DNA  
139 binding transcription factors.

140         The RLLLG motif is well-conserved in all  $\beta$ - and  $\gamma$ -herpesvirus homologs, despite overall  
141 poor sequence identity (**Supplemental Figure S1**), suggesting that this N-terminal region of  
142 ORF24 homologs may also be necessary for Pol II recruitment. To test if the three conserved  
143 leucine residues are involved in the homolog-Pol II interactions, we generated full-length wild-  
144 type or triple leucine mutants (3L\_A) of UL87, mu24, and BcRF1 with C-terminal Strep tags,  
145 transiently transfected plasmids encoding these constructs into HEK293T cells, and affinity  
146 purified using StrepTactinXT beads. Similarly to ORF24, mutation of the RLLLG motif ablated  
147 the interactions of all homologs with Pol II (**Figure 1**), suggesting that vTBPs interact with Pol II  
148 through their respective N-terminal domains in a manner dependent upon this highly conserved  
149 patch of residues.

150

#### 151 **The N-terminal domain of ORF24 is sufficient for interaction with Pol II**

152         To next test if the N-terminal domain is sufficient for the Pol II interaction, we constructed  
153 a series of N-terminal ORF24 fragments to identify a minimal region of the protein that retained  
154 the Pol II interaction (**Figure 2A**). Plasmids encoding full-length or truncated FLAG-tagged  
155 ORF24 were transfected into HEK293T cells and immunoprecipitated using FLAG antibodies to  
156 determine which ORF24 segments retained binding to endogenous Pol II. The smallest  
157 fragment of ORF24 that retained the Pol II interaction consisted of amino acids (a.a.) 1-201,  
158 which we termed the ORF24 N-terminal domain (ORF24-NTD) (**Figure 2B**). Notably, the  
159 remainder of the protein (a.a. 202-752), which includes the vTBP domain and a region known to  
160 interact with the vTA ORF34 (14), failed to co-immunoprecipitate Pol II. Thus, ORF24 contains  
161 an NTD that is both necessary and sufficient for Pol II binding, which is separable from the other  
162 two known functions of the protein.

163

## 164 **Identification of a minimal Pol II-interaction domain in the $\beta$ - and $\gamma$ -herpesviruses**

165 We next sought to determine if the NTD of homologs of ORF24 was similarly sufficient  
166 for Pol II interaction, with the goal of identifying whether the  $\beta$ - and  $\gamma$ -herpesviruses share a  
167 common domain for polymerase recruitment. Based on the boundary of the ORF24-NTD  
168 identified in Figure 2 and sequence alignments (**Supplemental Figure S1**), we designed  
169 constructs for mu24, BcRF1, and UL87 that encompassed either an analogous NTD, or  
170 versions of all the homologs where this domain is truncated by ten a.a. or extended by 25 a.a..  
171 Based on isoelectric point (pI) calculations (27), the full-length proteins are predicted to be  
172 electropositive, but the N-terminal protein-protein interaction domains are predicted to be  
173 electronegative (**Supplemental Figure S1**). The BcRF1 NTD appears to be an outlier in terms  
174 of overall predicted pI, which may change its physical properties when taken out of context of  
175 the full-length protein.

176 As expected, Strep-tagged ORF24 a.a. 1-201 (ORF24-NTD) or the extended domain  
177 containing a.a. 1-226 both interacted with Pol II in Strep affinity purifications from whole cell  
178 lysate (**Figure 3A**). Notably, reducing the ORF24-NTD by even ten a.a. eliminated its ability to  
179 interact with Pol II, suggesting that ORF24-NTD (a.a. 1-201) is, or is nearly, the minimal domain  
180 for the Pol II interaction (**Figure 3A**). The mu24 and UL87 proteins showed a similar pattern, in  
181 which the predicted domain equivalent to ORF24-NTD was sufficient for Pol II interaction, but  
182 further truncation by 10 a.a. eliminated the interaction (**Figure 3B, D**). In contrast, all truncations  
183 of BcRF1 failed to interact with Pol II (**Figure 3C**).

184 The above findings indicated that at least 3 of the vTBP homologs share a common N-  
185 terminal domain that, despite substantial sequence divergence, is necessary and sufficient for  
186 Pol II binding but distinct from other known functional regions of the proteins. Previous data  
187 demonstrated that the full-length vTBP from one virus cannot complement homologs in other  
188 herpesviruses (12). However, we considered the possibility that the specific Pol II recruitment  
189 domain might be functionally interchangeable between these vTBP homologs if the primary role

190 of this domain is to bring Pol II to late promoters. To test this, we generated chimeras of ORF24  
191 wherein the ORF24-NTD (a.a. 1-201) was replaced by the minimal NTD of its homologs  
192 (**Supplemental Figure S2A**). These chimeras retain the region of ORF24 that we previously  
193 identified as important for the ORF24-ORF34 interaction (14) as well as the ORF24 vTBP  
194 domain (18) and C-terminal domain. We noted that the full-length homologs of ORF24 do not  
195 interact with KSHV ORF34, despite conservation of an arginine (ORF24 R328) essential for the  
196 ORF24-ORF34 interaction (14) (**Supplemental Figure S2B**). However, each of the NTD  
197 chimeras interacted with both Pol II and KSHV ORF34, suggesting that the minimal NTD is  
198 sufficiently well-folded when fused to ORF24 a.a. 202-752 (**Supplemental Figure S2C**).  
199 Interestingly, although the minimal domain of BcRF1 alone failed to interact with Pol II by co-IP  
200 (**Figure 3D**), it is capable of interaction with Pol II when fused to ORF24 (**Supplemental Figure**  
201 **S2C**), suggesting that the BcRF1 minimal domain is sufficient for interaction with Pol II, but may  
202 have properties not compatible with Pol II interaction when truncated in an *in vitro* setting.

203 We assessed the ability of the NTD chimeras to functionally complement ORF24 using  
204 an established transfection-based late gene transcription assay (13-15). The six vTAs (ORFs  
205 18, 30, 31, 34, 66 and either WT ORF24, its homologs, or chimeras) were co-transfected into  
206 HEK293T cells, along with a firefly luciferase reporter controlled by the K8.1 late gene promoter  
207 or, as a control, the early ORF57 promoter. A Renilla luciferase reporter was also included to  
208 control for transfection efficiency. Consistent with previous observations (12), none of the full-  
209 length homologs could functionally complement ORF24 to activate the K8.1 promoter  
210 (**Supplemental Figure S3D**). However, the mu24-ORF24 chimera promoted transcription to  
211 levels ~40% that of wild-type ORF24. Interestingly, neither the BcRF1-ORF24 or UL87-ORF24  
212 chimeras were functional for late gene transcription, despite the fact that they could interact with  
213 both ORF34 and Pol II (**Supplemental Figure S3D**). This may suggest that the N-terminal  
214 domain has additional functions or interactions beyond polymerase recruitment that mu24 is  
215 able to maintain due to sequence similarity, or it may simply be that the mu24 fusion (but not the



216 BcRF1 or UL87 fusions) is positioned relative to the promoter and other vTAs in a manner  
217 similar enough to ORF24 to be functional. Thus, although the minimal NTD of all vTBPs  
218 interacts with Pol II, other contacts or functions may be necessary to successfully promote late  
219 gene transcription.

220 The minimal Pol II interaction domain identified here varies greatly in length (191 a.a. in  
221 mu24 vs. 248 a.a. in UL87) and in sequence, as no residues are conserved in both  $\beta$ - and  $\gamma$ -  
222 herpesviruses other than the RLLLG motif (**Supplemental Figure S1**). Despite this significant  
223 variation, ORF24 and its homologs have evolved a shared mechanism for Pol II recruitment that  
224 is primarily mediated by their respective N-terminal domains.

225

#### 226 **Negative stain electron microscopy of PICs with GST-ORF24-NTD suggests an** 227 **interaction with the Pol II stalk**

228 We next sought to determine how ORF24-NTD interacts with Pol II within a minimal PIC.  
229 To generate purified minimal ORF24-NTD for this purpose, we appended it to an N-terminal  
230 glutathione-S-transferase (GST) tag, and achieved robust expression of the protein in *E. coli*,  
231 similar to that of GST alone (**Figure 4A**). We confirmed that GST-tagged ORF24-NTD retained  
232 the ability to interact with Pol II using a GST pulldown with GST-ORF24-NTD and whole cell  
233 lysate from HEK293T cells, suggesting that recombinantly expressed GST-ORF24-NTD is well-  
234 folded (**Figure 4B**).

235 To assemble a minimal PIC that includes ORF24-NTD, we used a streptavidin-  
236 immobilized DNA scaffold based on the super core promoter element (SCP) (28), which  
237 contains the TATA, BRE, and INR core promoter elements (**Figure 4C**). Human TBP, TFIIA,  
238 TFIIB, and TFIIF were purified from *E. coli*, and Pol II was immunopurified from HeLa cell  
239 extracts (29). We expected that TBP binding to the TATA motif would initiate formation of the  
240 PIC with binding of TFIIA and TFIIB, followed by Pol II and TFIIF recruitment, and then binding  
241 of GST-ORF24-NTD. Therefore, any additional density beyond that seen in the well-

242 characterized minimal PIC (DNA/TBP/TFIIA/TFIIB/Pol II/TFIIF) (28) could be attributed to  
243 ORF24-NTD.

244 The minimal PIC was assembled by sequentially incubating the DNA scaffold with TBP,  
245 TFIIA and TFIIB, Pol II and TFIIF, and GST-ORF24-NTD, followed by immobilization on  
246 streptavidin-coated beads, and finally washing and elution from the beads (**Figure 4C**). We  
247 performed single particle negative stain EM of this assembled complex containing GST-ORF24-  
248 NTD, and searched for particles that displayed extra density beyond the well-defined minimal  
249 PIC structure. A total of 79,381 PIC particle images were analyzed by two-dimensional and  
250 three-dimensional classification, and approximately 25% showed clear extra density in the  
251 resulting class averages (**Figure 4D** and **Supplemental Figure S3**). Two of the three-  
252 dimensional classes (called Class 1 and 2) exhibit extra density on opposing faces of the Pol II  
253 stalk (**Figure 4D**), while a third class (Class 5) is comprised of the majority of particles without  
254 extra density near the Pol II stalk. Thus, Class 5 was used to subtract the density corresponding  
255 to the minimal PIC from Classes 1 and 2, resulting in difference maps that clearly show the  
256 region occupied by bound GST-ORF24-NTD (**Figure 4F**).

257 By superimposing the three-dimensional difference maps representing the extra density  
258 attributed to GST-ORF24-NTD onto the cryo-EM structure of the human minimal PIC (**Figure**  
259 **4G**) (30), it became evident that the ORF24-NTD is flexibly bound to a region of Pol II near the  
260 Rpb4/7 stalk module. An inherently flexible domain of Pol II is the CTD of the largest subunit,  
261 Rpb1, which contains a linker followed by 52 heptapeptide repeats (2) that is not visualized by  
262 EM due to its disordered structure. Docking of the crystal structure of Rpb1 from  
263 *Schizosaccharomyces pombe* (PDB 3H0G) (31), in which the structure of the CTD linker region  
264 is partially resolved and can be seen to extend along the surface of the stalk module, further  
265 indicates that the ORF24-NTD may be interacting with the flexible CTD of Pol II (**Figure 4H**).  
266 Together, these observations suggest that the NTD of the ORF24 vTBP interacts directly with

267 one or more Pol II subunits, which would be a unique feature distinct from other characterized  
268 eukaryotic viral or cellular transcription factors.

269

## 270 **ORF24-NTD binds the CTD repeats of Rpb1**

271         Based on the EM results, we hypothesized that ORF24 could be interacting with either  
272 Rpb4/7, the Rpb1 linker, or the Rpb1 CTD heptapeptide repeats. We therefore assessed  
273 whether recombinantly purified versions of each of these factors bound purified ORF24-NTD.  
274 We first performed GST-pulldown assays with GST-tagged Rpb1 CTD or Rpb1 linker and  
275 maltose-binding protein (MBP)-tagged ORF24-NTD. As a control, we also purified an MBP-  
276 tagged mutant version of ORF24-NTD, in which the three conserved leucines at positions L73-  
277 75 were mutated to alanines (ORF24-NTD-3L\_A). This mutation renders the protein unable to  
278 interact with Pol II in cells (19). Notably, WT ORF24-NTD bound to the Rpb1 CTD repeats, but  
279 not to the Rpb1 linker region (**Figure 5A**). This interaction was specific and mimicked the results  
280 in mammalian cell lysate, as no binding to either CTD fusion was observed with ORF24-NTD-  
281 3L\_A (**Figure 5A**). We also performed Strep pulldown assays using ORF24-NTD-Strep and the  
282 heterodimeric GST-Rpb4/Rpb7-His complex. Again, ORF24-NTD interacted with GST-CTD, but  
283 not with GST-Rpb4/Rpb7-His (**Figure 5B**). Thus, recombinant ORF24-NTD directly interacts  
284 with recombinant Pol II CTD repeats *in vitro*, and enrichment using tags on either the Pol II CTD  
285 or on ORF24 allows for the isolation of the other. The lack of interaction with the CTD linker  
286 domain or the Rpb4/7 stalk suggests that the CTD repeats are likely to be the primary point of  
287 Pol II contact with ORF24.

288         The CTD is a key regulatory component of Pol II, responsible for coordinating signals  
289 through interactions with multiple transcriptional modulators (2). CTD binding proteins engage  
290 with the heptapeptide repeats in a variety of ways, from recognition of a few residues of a repeat  
291 (in the case of kinases that promote phosphorylation at conserved serines, threonines, or  
292 tyrosines within a given repeat), to multiple consecutive repeats (in the case of Mediator (32)),

293 to recognition of the intrinsically disordered entire domain (in the case of newly-appreciated  
294 phase-separated interactions (33, 34)). To determine which of these types of interactions occur  
295 between the CTD and ORF24, we performed Strep pulldown assays with purified ORF24-NTD-  
296 Strep and recombinant GST-CTD constructs containing either 2, 4, 10, or 52 (full length)  
297 heptapeptide repeats. The recombinant GST-CTD used in these assays was unphosphorylated,  
298 as our previous results demonstrated that ORF24 co-immunoprecipitates only  
299 hypophosphorylated Pol II from mammalian cells (19). Notably, ORF24 interacted with 4x, 10x,  
300 and 52xCTD, but failed to interact with either 2xCTD repeats or with control GST (**Figure 5C**).  
301 Therefore, similar to the Mediator complex (32), ORF24 likely engages four tandem repeats to  
302 interact with the Pol II CTD.

303

## 304 **DISCUSSION**

305 Late gene transcription in the  $\beta$ - and  $\gamma$ -herpesviruses depends on a set of viral  
306 transcriptional activators, including a virally-encoded mimic of host TBP. Here, we demonstrate  
307 that the N-terminal domain (NTD) of the ORF24 vTBP from KSHV recruits Pol II through a direct  
308 protein-protein interaction with four heptapeptide repeats of the Pol II C-terminal domain (CTD).  
309 Conserved residues in the ORF24-NTD are required for this interaction, suggesting that vTBPs  
310 in  $\beta$ - and  $\gamma$ -herpesviruses have evolved a shared strategy for recruitment of Pol II to late gene  
311 promoters. Domain swapping experiments between homologs suggest that the primary function  
312 of the NTD of vTBP in  $\beta$ - and  $\gamma$ -herpesviruses is to recruit Pol II to the late gene promoter and  
313 that the NTD is functionally distinct from the remainder of the protein. Our work conclusively  
314 demonstrates that vTBP is unique among eukaryotic transcriptional activators in its ability to  
315 simultaneously bind promoter DNA and Pol II, and that this strategy is conserved across the  $\beta$ -  
316 and  $\gamma$ -herpesviruses.

317 Eukaryotic PIC assembly is nucleated by the deployment of TBP onto the promoter DNA  
318 by TFIID (35) and is followed by recruitment of other GTFs and Pol II. Unlike the direct

319 interaction that occurs between the ORF24 vTBP and Pol II, the interaction between cellular  
320 TBP and Pol II is bridged through GTFs. The  $\beta$ - and  $\gamma$ -herpesviruses have thus adopted a  
321 solution reminiscent of bacterial sigma factors, wherein vTBP binds promoter DNA while also  
322 recruiting the polymerase directly to the promoter (36). This raises the question of whether  
323 vTBP-mediated Pol II recruitment alters the requirement or roles for other GTFs that contact Pol  
324 II. Of particular interest is the role or presence of TFIIB, which both interacts with TBP and is  
325 necessary for Pol II recruitment early in PIC formation, functions that may not be necessary in  
326 the vPIC given the interactions mediated by vTBP (20, 37). In this regard, it has recently been  
327 shown that the levels of some components of the Pol II transcriptional machinery, including  
328 TFIIB, are significantly decreased at late times during lytic gammaherpesvirus infection (38). It is  
329 possible that these viruses assemble alternative transcription complexes in part to compensate  
330 for reduced availability of key host factors. The role or presence of other GTFs in vPIC  
331 assembly, including TFIIE and TFIIH, which are important for promoter opening and  
332 phosphorylation of the Pol II CTD, are also unknown (39). An intriguing possibility is that the  
333 other vTAs fulfill some subset of GTF-like functions during formation of the late gene vPIC. In  
334 this regard, we have recently demonstrated that the KSHV vTAs ORF30 and ORF66 are  
335 essential for stable binding of ORF24 to the K8.1 late gene promoter (15). Determining which of  
336 the canonical GTFs are engaged in the vPIC will be key to understanding how this unique  
337 hybrid virus-host complex activates late gene transcription.

338 Our work reveals that ORF24 directly binds hypophosphorylated CTD repeats,  
339 consistent with a role facilitating viral PIC formation on late gene promoters. CTD-interacting  
340 proteins exhibit exceptional diversity in their strategy for recognition of the CTD and in their  
341 preference for phosphorylation (40). Relatively few proteins interact with hypophosphorylated  
342 CTD; these proteins (TFIID, TFIIE, TFIIIF, and Mediator) are all involved in PIC formation, as  
343 phosphorylation of the CTD results in release from the PIC into elongating complexes (41). The  
344 best characterized hypophosphorylated CTD interacting protein is the Mediator coactivator

345 complex (42). Mediator is a multi-subunit complex, and its interactions with the Pol II CTD are  
346 extensive, involving numerous Mediator subunits (32, 43-45). A crystal structure of the Mediator  
347 head module with the CTD revealed coordination of nearly four CTD repeats (32). Given the  
348 requirement for ORF24-NTD to bind at least four CTD repeats, we are intrigued by the  
349 possibility that vTBP functionally or structurally mimics the Mediator head module. One striking  
350 difference is the small size of the ORF24-NTD domain that nevertheless efficiently binds the  
351 CTD. Mediator is thought to transmit signals from transcription factors bound at regulatory  
352 elements to the basal transcriptional machinery (46). Late gene promoters have exceedingly  
353 minimal promoters and lack identified enhancer elements (8); thus, it is unclear if a Mediator-like  
354 function is required for transcription, or if recruitment of Pol II to the promoter is sufficient for  
355 transcription. The other vTAs may play a role in bridging currently unidentified enhancers or  
356 other elements, and may communicate this information to Pol II through the ORF24-ORF34  
357 interaction.

358         A chimeric vTBP in which the minimal Pol II-interacting domain from ORF24 is replaced  
359 with that of mu24 is able to recruit Pol II and maintain interactions with other KSHV vTAs in  
360 order to form the vPIC and facilitate transcription. This is the first example of functional  
361 interchangeability of any subcomponent of the vTA complex. However, the role of vTBP in late  
362 gene transcription extends beyond polymerase recruitment, as vTBP also recruits the remainder  
363 of the vTAs to the promoter through protein-protein interactions while also directly binding the  
364 late gene promoter DNA.

365         In summary, ORF24 is a viral transcriptional activator that replaces TBP at late gene  
366 promoters and directly recruits Pol II to transcribe viral late genes. That ORF24 binds both the  
367 unphosphorylated CTD of Pol II and promoter DNA makes it unique among known eukaryotic  
368 CTD-interacting proteins. Since these two functions of ORF24 are genetically separable, they  
369 can be characterized independently of one another. Future work to gain atomic-level insight into

370 how ORF24-NTD coordinates the CTD repeats will advance our understanding of its remarkable  
371 role in the regulation of late gene transcription in the  $\beta$ - and  $\gamma$ -herpesviruses.

372

## 373 **MATERIALS AND METHODS**

### 374 **Plasmids**

375 All primer sequences are listed in **Table 1**. All plasmids used in this study have been  
376 deposited to Addgene. The following ORF24 fragments: residues 1-201 (ORF24-NTD)  
377 (Addgene #138420), residues 1-271 (Addgene #138421), and residues 1-133 (Addgene  
378 #138422) were PCR amplified from pcDNA4/TO-ORF24-3xFLAG (19) (Addgene #138423) with  
379 primers to introduce BamHI and NotI sites and cloned into pcDNA4/TO-3xFLAG (C-terminal tag)  
380 using T4 DNA ligase (New England Biolabs). pcDNA4/TO-ORF24 202-752-3xFLAG (Addgene  
381 #138424) was generated by inverse site-directed mutagenesis with Phusion DNA polymerase  
382 (New England Biolabs) using pcDNA4/TO-ORF24-3xFLAG as a PCR template. PCR products  
383 from inverse PCR were DpnI treated, then ligated using T4 PNK and T4 DNA ligase (New  
384 England Biolabs).

385 To generate the plasmid for GST-ORF24-NTD expression (Addgene #138464), ORF24-  
386 NTD (residues 1-201) was PCR amplified from pcDNA4/TO-ORF24-3xFLAG with primers to  
387 introduce BamHI and NotI sites and cloned into pGEX4T1 using T4 DNA ligase. pGEX4T1  
388 encodes an N-terminal GST tag followed by a thrombin cleavage site. To generate the plasmid  
389 for MBP-ORF24-NTD WT (Addgene #138465) and 3L\_A (Addgene #138466) expression,  
390 ORF24-NTD was PCR amplified from pcDNA4/TO-ORF24-3xFLAG WT (Addgene #138423) or  
391 3L\_A (Addgene #138425) (19) with primers to introduce SacI and BamHI sites and cloned into  
392 pMAL-c2X using T4 DNA ligase. pMAL-c2X encodes an N-terminal MBP tag and the plasmids  
393 were cloned to express ORF24-NTD with a noncleavable MBP tag. ORF24-NTD was PCR  
394 amplified from pcDNA4/TO-ORF24-3xFLAG WT and cloned into the KpnI and EcoRI sites of

395 plasmid p6H-SUMO3 using InFusion. A C-terminal Strep tag on ORF24-NTD was added by  
396 inverse PCR to generate p6H-SUMO3-ORF24-NTD-Strep (Addgene #138467).

397 To make the plasmid for GST-Rpb1-linker expression (Addgene #138468), the linker  
398 region of Rpb1 (a.a. 1460-1585) was PCR amplified from HEK293T cDNA with primers to  
399 introduce BamHI and NotI sites and cloned into pGEX4T1 using T4 DNA ligase. Rpb4 was  
400 PCR-amplified from HEK293T cDNA with primers to introduce a BamHI site and cloned into  
401 pGEX4T1 using InFusion. The N-terminal BamHI site was regenerated to keep Rpb4 in the  
402 same reading frame as the GST fusion tag. Rpb7 was PCR amplified from HEK293T cDNA with  
403 primers to introduce a Shine-Delgarno sequence and a C-terminal 6x-His tag and cloned into  
404 the EcoRI and NotI sites of pGEX4T1-Rpb4 using T4 DNA ligase to generate pGEX4T1-Rpb4/7  
405 (Addgene #138484).

406 The 2x and 4x CTD repeat inserts were ordered as a pair of oligonucleotides from IDT,  
407 and the primers were annealed by cooling from 90°C to room temperature in a water bath. The  
408 10x CTD repeat insert was ordered as a synthesized gene block from IDT (**Table 2**). All CTD  
409 inserts were cloned into the BamHI and NotI sites of pQLink-GST using InFusion cloning  
410 (Addgene #138470-138472) (Clontech). pQLink-GST encodes an N-terminal GST tag followed  
411 by a TEV protease cleavage site.

412 The following mutations were introduced into pcDNA4/TO-ORF24-3xFLAG using two  
413 primer site-directed mutagenesis with KAPA HiFi polymerase (Roche): L73A (Addgene  
414 #138426), L74A (Addgene #138427), L75A (Addgene #138428), L73A\_L75A (Addgene  
415 #138429), L74A\_L75A (Addgene #138430), R68A (Addgene #138431), and R72A (Addgene  
416 #138432). The L73A\_L74A mutation (Addgene #138433) was introduced using InFusion  
417 (Clontech) site-directed mutagenesis.

418 Full-length ORF24 with a C-terminal Strep tag (pcDNA4/TO-ORF24-2xStrep) (Addgene  
419 plasmid #129742) was previously described (13). Full-length ORF24 with the 3L\_A mutation  
420 was subcloned from pcDNA4/TO-ORF24 3L\_A-CFLAG (Addgene #138425) into the BamHI and



421 XhoI sites of pcDNA4/TO-2xStrep (C-terminal tag) using InFusion cloning (Addgene #138440).  
422 Full-length UL87 was PCR amplified from HCMV Towne BAC DNA with primers to introduced  
423 EcoRI and XhoI sites and cloned into pcDNA4/TO-2xStrep (C-terminal tag) using T4 DNA ligase  
424 (Addgene #138434). Full-length mu24 was PCR amplified from MHV68-infected 3T3 cell cDNA  
425 with primers to introduce BamHI and NotI sites and cloned into pcDNA4/TO-2xStrep (C-terminal  
426 tag) using T4 DNA ligase (Addgene #138435). Full-length BcRF1 was PCR amplified from  
427 pcDNA4/TO-BcRF1-3xFLAG (19) and cloned into the BamHI and XhoI sites of pcDNA4/TO-  
428 2xStrep (C-terminal tag) using InFusion cloning (Addgene #138436). Mutations of the RLLLG  
429 motif in UL87, mu24, and BcRF1 (3L\_A mutations) (Addgene #138437-138439) were generated  
430 using inverse PCR site-directed mutagenesis.

431 The minimal domains, minimal domain - 10 a.a., and minimal domain + 25 a.a. for  
432 ORF24, mu24, BcRF1, and UL87 were PCR amplified from these plasmids and cloned into  
433 BamHI/XhoI-cut pcDNA4/TO-2xStrep (C-terminal tag) using InFusion cloning (Addgene  
434 #138441-138452). Chimeras of the minimal domain (NTD) ORF24 homologs with ORF24 202-  
435 752 were generated using two-insert InFusion cloning (Addgene #138453-138455) into  
436 BamHI/XhoI-cut pcDNA4/TO-2xStrep (C-terminal tag).

437 Plasmid K8.1 Pr pGL4.16 (Addgene plasmid #120377) contains the minimal K8.1  
438 promoter and ORF57 Pr pGL4.16 (Addgene plasmid #120378) contains a minimal ORF57 early  
439 gene promoter and have been described previously (13). Plasmids pcDNA4/TO-ORF18-2xStrep  
440 (Addgene plasmid #120372), pcDNA4/TO-ORF24-2xStrep (Addgene plasmid #129742),  
441 pcDNA4/TO-ORF30-2xStrep (Addgene plasmid #129743), pcDNA4/TO-ORF31-2xStrep  
442 (Addgene plasmid #129744), pcDNA4/TO-2xStrep-ORF34 (Addgene plasmid #120376) have  
443 been previously described (13). Plasmid pRL-TK (Promega) was kindly provided by Dr. Russell  
444 Vance.

445

446

447 **Tissue Culture and Transfections**

448 HEK293T cells (ATCC CRL-3216) were maintained in DMEM supplemented with 10%  
449 FBS (Seradigm). For DNA transfections, HEK293T cells were plated and transfected after 24  
450 hours at 70% confluency with PolyJet (SignaGen).

451

452 **Immunoprecipitation and Western Blotting**

453 Cell lysates were prepared 24 hours after transfection by washing and pelleting cells in  
454 cold PBS, then resuspending the pellets in IP lysis buffer [50 mM Tris-HCl pH 7.4, 150 mM  
455 NaCl, 1 mM EDTA, 0.5% NP-40, and protease inhibitor (Roche)] and rotating for 30 minutes at  
456 4°C. Lysates were cleared by centrifugation at 21,000 x *g* for 10 min, then 1-2 mg (as indicated)  
457 of total protein was incubated with pre-washed M2  $\alpha$ -FLAG magnetic beads (Sigma) or  
458 MagStrep “type3” XT beads (IBA) overnight. Beads were washed 3x for 5 min each with IP  
459 wash buffer (50 mM Tris-HCl pH 7.4, 150 mM NaCl, 1 mM EDTA, 0.05% NP-40) and eluted by  
460 boiling in 2x Laemmli sample buffer (BioRad).

461 Lysates and elutions were resolved by SDS-PAGE and analyzed by western blot in  
462 TBST (Tris-buffered saline, 0.2% Tween 20) using the following primary antibodies: rabbit  $\alpha$ -  
463 FLAG (Sigma, 1:2500); Strep-HRP (Millipore, 1:2500); rabbit  $\alpha$ -Pol II clone N20 (Santa Cruz,  
464 1:2500); mouse  $\alpha$ -GST clone 8-326 (Pierce, 1:2000); mouse  $\alpha$ -MBP (NEB, 1:10000); mouse  $\alpha$ -  
465 Pol II CTD clone 8WG16 (Abcam, 1:1000), rabbit  $\alpha$ -Vinculin (Abcam, 1:1000), mouse anti-  
466 GAPDH (1:1,000; Abcam). Following incubation with primary antibodies, the membranes were  
467 washed with TBST and incubated with the appropriate secondary antibody. The secondary  
468 antibodies used were the following: goat  $\alpha$ -mouse-HRP (Southern Biotech, 1:5000) and goat  $\alpha$ -  
469 rabbit-HRP (Southern Biotech, 1:5000).

470

471

472

473 **Protein Expression and Purification**

474 ***GST-ORF24-NTD, GST-CTD linker, and GST.*** Proteins were expressed in Rosetta 2 cells  
475 (EMD Millipore) grown in LB at 37°C and induced at an OD<sub>600</sub> of 0.7 with 0.5 mM IPTG for 16  
476 hours at 18°C. The cells were harvested by centrifugation at 6500 x g for 10 minutes. The cell  
477 pellets were either frozen or immediately resuspended in lysis buffer [50 mM HEPES, pH 7.4,  
478 200 mM NaCl, 1 mM EDTA, 1 mM DTT, protease inhibitors (Roche)] and lysed by sonication.  
479 The insoluble fraction was removed by centrifugation at 21,000 x g for 30 minutes. GST-OR24-  
480 NTD, GST-CTD linker, and GST were purified on Glutathione Sepharose (GE Healthcare) by  
481 batch purification. The proteins were eluted in wash buffer (50 mM HEPES, pH 7.4, 200 mM  
482 NaCl, 1 mM EDTA, 1 mM DTT) containing 10 mM reduced glutathione and dialyzed into storage  
483 buffer (50 mM HEPES, pH 7.4, 200 mM NaCl, 1 mM EDTA, 1 mM DTT, 10% glycerol).

484  
485 ***GST-xCTD repeats.*** GST-2xCTD repeats, GST-4xCTD repeats, and GST-10xCTD repeats  
486 were expressed in BL21 Star (DE3) cells grown in Overnight Express Instant TB Medium (EMD  
487 Millipore) at 37°C and induced at an OD<sub>600</sub> of 1.0 by decreasing the temperature to 18°C and  
488 growing for an additional 16 hours. The cells were harvested by centrifugation at 6500 x g for 10  
489 minutes. The cell pellets were either frozen or immediately resuspended in lysis buffer [50 mM  
490 HEPES, pH 7.4, 300 mM NaCl, 5 mM DTT, 5% glycerol, protease inhibitors (Roche)] and lysed  
491 by sonication. The insoluble fraction was removed by centrifugation at 50,000 x g for 30  
492 minutes. The proteins were purified as described above and eluted in wash buffer (50 mM  
493 HEPES, pH 7.4, 300 mM NaCl, 5 mM DTT, 5% glycerol) containing 10 mM reduced glutathione.

494  
495 ***MBP-ORF24-NTD.*** The protein was expressed in Rosetta 2 cells grown in LB at 37°C and  
496 induced at an OD<sub>600</sub> of 0.7 with 0.5 mM IPTG for 16 hours at 18°C. The cells were harvested by  
497 centrifugation at 6500 x g for 10 minutes. The cell pellets were either frozen or immediately  
498 resuspended in lysis buffer [50 mM HEPES, pH 7.4, 200 mM NaCl, 1 mM EDTA, 1 mM DTT,

499 protease inhibitors (Roche)] and lysed by sonication. The insoluble fraction was removed by  
500 centrifugation at 21,000 x g for 30 minutes. MBP-ORF24-NTD was purified by gravity column  
501 chromatography with Amylose Resin (New England Biolabs). The protein was eluted in wash  
502 buffer (50 mM HEPES, pH 7.4, 200 mM NaCl, 1 mM EDTA, 1 mM DTT) containing 10 mM  
503 maltose and dialyzed into storage buffer (50 mM HEPES pH 7.4, 200 mM NaCl, 1mM DTT, 10%  
504 glycerol).

505

506 ***ORF24-NTD-Strep***. The protein was expressed in NiCo21 (DE3) cells (New England Biolabs)  
507 grown in Overnight Express Instant TB Medium (EMD Millipore) at 37°C and induced at an  
508 OD<sub>600</sub> of 1.0 by decreasing the temperature to 18°C and growing for an additional 16 hours. The  
509 cells were harvested by centrifugation at 6,500 x g for 10 minutes. The cell pellets were either  
510 frozen or immediately resuspended in lysis buffer [100 mM HEPES, pH 7.5, 500 mM NaCl,  
511 0.1% Triton X-100, 10% glycerol, 20 mM imidazole, 1 mM TCEP, protease inhibitors (Roche)]  
512 and lysed by sonication. The lysate was cleared by centrifugation at 50,000 x g for 30 minutes.  
513 The clarified lysate was filtered through a 0.45 µm PES filter (Foxy Life Sciences). The protein  
514 was purified on an equilibrated HisTrap (GE Healthcare) and step-eluted in wash buffer (100  
515 mM HEPES, pH 7.5, 500 mM NaCl, 0.1% Triton X-100, 10% glycerol, 1 mM TCEP) containing  
516 500 mM imidazole. The fractions containing 6xHis-SUMO-ORF24-NTD-Strep were pooled. The  
517 SUMO tag was cleaved overnight at 4°C with 1 mg of SenP2 protease. Following cleavage of  
518 the SUMO tag, ORF24-NTD-Strep was purified on an equilibrated StrepTrap (GE Healthcare)  
519 and step-eluted in wash buffer (50 mM Tris-HCl, pH 8.0, 200 mM NaCl, 10 % glycerol, 1 mM  
520 TCEP) containing 2.5 mM desthiobiotin (IBA). The Strep elution fractions containing ORF24-  
521 NTD-Strep were pooled and sized on a Superdex 200 (GE Healthcare) size exclusion  
522 chromatography (SEC) column in SEC buffer (20 mM HEPES pH 7.4, 100 mM NaCl, 1 mM  
523 TCEP, 5% glycerol). The fractions containing ORF24-NTD-Strep were pooled and concentrated

524 on a 10K Amicon Ultra-15 concentrator (EMD Millipore). Protein aliquots were flash frozen and  
525 stored at -70°C.

526

## 527 **Pulldown Assays**

### 528 ***GST pulldowns***

529 To test the interaction between GST-ORF24-NTD and Pol II from mammalian cells, 10  
530 µg GST-ORF24-NTD or 10 µg GST was added to 20 µl of washed Glutathione Magnetic  
531 Agarose beads (Pierce) along with 250 µg of 293T whole cell lysate. IP wash buffer (50 mM Tris  
532 pH 7.4, 150 mM NaCl, 0.05% NP-40, 1 mM EDTA) was added to a final volume of 300 µl. The  
533 samples were rotated at 4°C for 1 hour. Following the pulldown, the samples were washed with  
534 IP wash buffer three times for 5 minutes each time. After the last wash, the protein was eluted  
535 by boiling in 2x Laemmli sample buffer (BioRad). The pulldown to test the interaction between  
536 GST-CTD repeats or GST-CTD linker and MBP-ORF24-NTD or MBP-ORF24-NTD 3L\_A were  
537 performed as described above. The elutions were resolved by SDS-PAGE followed by western  
538 blot.

### 539 ***Strep pulldowns***

540 To test the interaction between ORF24-NTD and Rpb4/7 or xCTD repeats, 5 µg of  
541 ORF24-NTD-Strep was added to 10 µl of washed MagStrep “type 3” XT Beads (IBA) along with  
542 10 µg of GST-Rpb4/Rpb7-6xHis or GST-xCTD repeats. SEC buffer (20 mM HEPES pH 7.4, 100  
543 mM NaCl, 1 mM TCEP, 5% glycerol) including 0.05% NP-40 and 5 mM DTT was added to a  
544 final volume of 300 µl. The pulldowns were rotated at 4°C for 1 hour followed by three 5 minute  
545 washes. The protein was eluted by boiling in 2x Laemmli sample buffer. Elutions were resolved  
546 by SDS-PAGE on a Stain-free gel (BioRad) followed by western blot.

547

548

549

## 550 **Late Gene Reporter Assay**

551 HEK293T cells ( $1 \times 10^6$  cells) were plated in 6-well plates and after 24 h each well was  
552 transfected with 900 ng of DNA containing 125 ng each of pcDNA4/TO-ORF18-2xStrep, wild-  
553 type pcDNA4/TO-ORF24-2xStrep or a homolog of ORF24, pcDNA4/TO-ORF30-2xStrep,  
554 pcDNA4/TO-ORF31-2xStrep, pcDNA4/TO-2xStrep-ORF34, pcDNA4/TO-ORF66-2xStrep (or as  
555 a control, 750 ng of empty pcDNA4/TO-2xStrep plasmid in lieu of vTA plasmids), with either  
556 K8.1 Pr pGL4.16 or ORF57 Pr pGL4.16, along with 25 ng of pRL-TK as an internal transfection  
557 control. After 24 h, cells were rinsed twice with PBS, lysed by rocking for 15 min at room  
558 temperature in 500  $\mu$ L of Passive Lysis Buffer (Promega), and clarified by centrifugation at  
559 21,000 x g for 2 min. 20  $\mu$ L of the clarified lysate was added in triplicate to a white chimney well  
560 microplate (Greiner Bio-One) to measure luminescence on a Tecan M1000 microplate reader  
561 using a Dual Luciferase Assay Kit (Promega). The firefly luminescence was normalized to the  
562 internal Renilla luciferase control for each transfection. All samples were normalized to the  
563 corresponding control containing empty plasmid.

564

## 565 **Negative Stain Electron Microscopy**

566 ***PIC assembly and purification.*** TBP, TFIIA, and TFIIIB were recombinantly expressed and  
567 purified from *E. coli*. Pol II was immunopurified from HeLa cell nuclear extracts following  
568 previously published protocols (29, 47). The DNA construct was previously described (28) and  
569 is an SCP (48) containing a BREu element upstream of the TATA box (21) and an EcoRI  
570 restriction enzyme site downstream of the INR element for purification purposes. A biotin tag  
571 was coupled to the 5' end of the template strand (Integrated DNA Technologies). The duplex  
572 DNA was generated by annealing the single-stranded template strand DNA with equimolar  
573 amounts of non-template strand DNA at a final concentration of 50  $\mu$ M in water. The annealing  
574 reaction was carried out by incubating at 98°C for 2 minutes followed by cooling to room  
575 temperature at a rate of 1°C per second.

576 PICs were assembled in assembly buffer (20 mM HEPES, pH 7.9, 0.2 mM EDTA, 10%  
577 glycerol, 6 mM MgCl<sub>2</sub>, 80 mM KCl, 1 mM DTT, 0.05% NP-40). DNA was used as a scaffold and  
578 purified TBP, TFIIA, TFIIB, Pol II, TFIIF, and GST-ORF24-NTD were sequentially added into the  
579 assembly buffer. Following assembly of the PICs, the reaction was incubated at 28°C for 15  
580 minutes using a 1:10 dilution of magnetic streptavidin T1 beads (Invitrogen), which had been  
581 previously equilibrated in assembly buffer. The beads were washed three times with wash buffer  
582 (10 mM HEPES, 3% trehalose, 8 mM MgCl<sub>2</sub>, 100 mM KCl, 1 mM DTT, 0.025% NP-40). The  
583 complex was eluted by incubation at 28°C for 1 hour in digestion buffer (10 mM HEPES, pH 7.9,  
584 3% trehalose, 10 mM MgCl<sub>2</sub>, 50 mM KCl, 1 mM DTT, 0.01% NP-40, 1 unit μL<sup>-1</sup> EcoRI-HF (New  
585 England Biolabs)). After elution, purified PIC was crosslinked on ice in 0.05% glutaraldehyde for  
586 5 minutes then immediately used for EM sample preparation.

587

588 **Electron microscopy.** Negative stain samples of PIC were prepared on a 400 mesh copper  
589 grid containing a continuous carbon supporting layer. The grid was plasma-cleaned for 10  
590 seconds using a Solarus plasma cleaner (Gatan). An aliquot (3.5 μL) of the purified sample was  
591 placed onto the grid and allowed to absorb for 5 minutes at 100% humidity. The grid was then  
592 placed sample-side-down on five successive 75 μL drops of 2% (w/v) uranyl formate solution for  
593 10 seconds on each drop followed by blotting to dryness. Data collection was performed on a  
594 Tecnai F20 TWIN transmission electron microscope operating at 120 keV at a nominal  
595 magnification of 80,000X (1.5 Å/pixel). The data were collected on a 4k X 4k CCD (Gatan) using  
596 low-dose procedures (20 e<sup>-</sup> Å<sup>-2</sup> total dose per exposure), using Legikon software to  
597 automatically focus and collect exposure images.

598

599 **Image processing.** Data pre-processing was performed using the Appion processing  
600 environment (49). Particles were automatically selected from the micrographs using a difference  
601 of Gaussians (DoG) particle picker (50). The contrast transfer function (CTF) of each

602 micrograph was estimated using both ACE2 and CTFFind (51, 52). Boxed particle images were  
603 extracted using a box size of 256 X 256 pixels from images whose ACE2 confidence value was  
604 greater than 0.8, phases were flipped, and images were normalized using the XMIPP to remove  
605 pixels which were above or below  $4.5\sigma$  of the mean value (53). The particle stack was binned by  
606 a factor of two and two-dimensional classification was conducted using iterative multireference  
607 alignment analysis (MSA-MRA) within the IMAGIC software (54).

608

609 ***Three-dimensional reconstruction.*** Particles belonging to bad two-dimensional classes were  
610 thrown out, resulting in a stack of 79381 single particle images that were used for three-  
611 dimensional analysis. Three-dimensional classification was performed within RELION (55),  
612 using the cryo-EM structural of a minimal PIC (EMD-2305, (28)), low-pass filtered to 50 Å  
613 resolution, as an initial reference, and sorted into 6 classes. The resolution of the  
614 reconstructions containing GST-ORF24-NTD were estimated to be ~20 Å.

615

## 616 **ACKNOWLEDGEMENTS**

617 We thank Jie Fang for purification of human GTFs and Pol II, and Patricia Grob and  
618 Abhiram Chintangal for microscope and computational support, respectively. We are thankful to  
619 all members of the Glaunsinger lab, especially Divya Nandakumar, for helpful discussions and  
620 suggestions. This research was supported by NIH R01AI122528 to B.G. and R01GM63072 and  
621 R35GM127018 to E.N. A.C. was supported by a National Science Foundation Graduate  
622 Research Fellowship (DGE 1752814) and a UC Berkeley Chancellor's Fellowship. A.L.D. is The  
623 Rhee Family Fellow of the Damon Runyon Cancer Research Foundation (DRG-2349-18). B.G.  
624 and E.N. are investigators of the Howard Hughes Medical Institute.

625

## 626 **COMPETING INTERESTS**

627 None



628 **REFERENCES**

- 629 1. M. C. Thomas, C. M. Chiang, The general transcription machinery and general  
630 cofactors. *Crit Rev Biochem Mol Biol* **41**, 105-178 (2006).
- 631 2. K. M. Harlen, L. S. Churchman, The code and beyond: transcription regulation by the  
632 RNA polymerase II carboxy-terminal domain. *Nat Rev Mol Cell Biol* **18**, 263-273 (2017).
- 633 3. S. Buratowski, Progression through the RNA polymerase II CTD cycle. *Mol Cell* **36**, 541-  
634 546 (2009).
- 635 4. H. Lu, O. Flores, R. Weinmann, D. Reinberg, The nonphosphorylated form of RNA  
636 polymerase II preferentially associates with the preinitiation complex. *Proc Natl Acad Sci*  
637 *U S A* **88**, 10004-10008 (1991).
- 638 5. D. L. V. Bauer *et al.*, Influenza Virus Mounts a Two-Pronged Attack on Host RNA  
639 Polymerase II Transcription. *Cell Rep* **23**, 2119-2129 e2113 (2018).
- 640 6. T. Chi, M. Carey, Assembly of the isomerized TFIIA--TFIID--TATA ternary complex is  
641 necessary and sufficient for gene activation. *Genes Dev* **10**, 2540-2550 (1996).
- 642 7. A. Haigh, R. Greaves, P. O'Hare, Interference with the assembly of a virus-host  
643 transcription complex by peptide competition. *Nature* **344**, 257-259 (1990).
- 644 8. D. Nandakumar, B. Glaunsinger, An integrative approach identifies direct targets of the  
645 late viral transcription complex and an expanded promoter recognition motif in Kaposi's  
646 sarcoma-associated herpesvirus. *PLoS Pathog* **15**, e1007774 (2019).
- 647 9. T. R. Serio, N. Cahill, M. E. Prout, G. Miller, A functionally distinct TATA box required for  
648 late progression through the Epstein-Barr virus life cycle. *J Virol* **72**, 8338-8343 (1998).
- 649 10. S. Tang, K. Yamanegi, Z. M. Zheng, Requirement of a 12-base-pair TATT-containing  
650 sequence and viral lytic DNA replication in activation of the Kaposi's sarcoma-associated  
651 herpesvirus K8.1 late promoter. *J Virol* **78**, 2609-2614 (2004).
- 652 11. E. Wong-Ho *et al.*, Unconventional sequence requirement for viral late gene core  
653 promoters of murine gammaherpesvirus 68. *J Virol* **88**, 3411-3422 (2014).
- 654 12. V. Aubry *et al.*, Epstein-Barr virus late gene transcription depends on the assembly of a  
655 virus-specific preinitiation complex. *J Virol* **88**, 12825-12838 (2014).
- 656 13. A. F. Castaneda, B. A. Glaunsinger, The Interaction between ORF18 and ORF30 Is  
657 Required for Late Gene Expression in Kaposi's Sarcoma-Associated Herpesvirus. *J Virol*  
658 **93** (2019).
- 659 14. Z. H. Davis, C. R. Hesser, J. Park, B. A. Glaunsinger, Interaction between ORF24 and  
660 ORF34 in the Kaposi's Sarcoma-Associated Herpesvirus Late Gene Transcription Factor  
661 Complex Is Essential for Viral Late Gene Expression. *J Virol* **90**, 599-604 (2016).
- 662 15. A. L. Didychuk, A. F. Castaneda, L. O. Kushnir, C. J. Huang, B. A. Glaunsinger,  
663 Conserved CxnC motifs in Kaposi's sarcoma-associated herpesvirus ORF66 are  
664 required for viral late gene expression and are essential for its interaction with ORF34. *J*  
665 *Virology* 10.1128/JVI.01299-19 (2019).
- 666 16. D. Pan *et al.*, Murine Cytomegalovirus Protein pM91 Interacts with pM79 and Is Critical  
667 for Viral Late Gene Expression. *J Virol* **92** (2018).
- 668 17. H. Gruffat, F. Kadjouf, B. Mariame, E. Manet, The Epstein-Barr virus BcRF1 gene  
669 product is a TBP-like protein with an essential role in late gene expression. *J Virol* **86**,  
670 6023-6032 (2012).
- 671 18. L. S. Wyrwicz, L. Rychlewski, Identification of Herpes TATT-binding protein. *Antiviral*  
672 *Res* **75**, 167-172 (2007).
- 673 19. Z. H. Davis *et al.*, Global mapping of herpesvirus-host protein complexes reveals a  
674 transcription strategy for late genes. *Mol Cell* **57**, 349-360 (2015).
- 675 20. H. T. Chen, S. Hahn, Binding of TFIIIB to RNA polymerase II: Mapping the binding site  
676 for the TFIIIB zinc ribbon domain within the preinitiation complex. *Mol Cell* **12**, 437-447  
677 (2003).

- 678 21. F. T. Tsai, P. B. Sigler, Structural basis of preinitiation complex assembly on human pol  
679 II promoters. *EMBO J* **19**, 25-36 (2000).
- 680 22. M. Lukarska *et al.*, Structural basis of an essential interaction between influenza  
681 polymerase and Pol II CTD. *Nature* **541**, 117-121 (2017).
- 682 23. C. Zhou, D. M. Knipe, Association of herpes simplex virus type 1 ICP8 and ICP27  
683 proteins with cellular RNA polymerase II holoenzyme. *J Virol* **76**, 5893-5904 (2002).
- 684 24. J. Q. Dai-Ju, L. Li, L. A. Johnson, R. M. Sandri-Goldin, ICP27 interacts with the C-  
685 terminal domain of RNA polymerase II and facilitates its recruitment to herpes simplex  
686 virus 1 transcription sites, where it undergoes proteasomal degradation during infection.  
687 *J Virol* **80**, 3567-3581 (2006).
- 688 25. A. Feklistov, B. D. Sharon, S. A. Darst, C. A. Gross, Bacterial sigma factors: a historical,  
689 structural, and genomic perspective. *Annu Rev Microbiol* **68**, 357-376 (2014).
- 690 26. L. V. Nobre *et al.*, Human cytomegalovirus interactome analysis identifies degradation  
691 hubs, domain associations and viral protein functions. *Elife* **8** (2019).
- 692 27. L. P. Kozlowski, IPC - Isoelectric Point Calculator. *Biol Direct* **11**, 55 (2016).
- 693 28. Y. He, J. Fang, D. J. Taatjes, E. Nogales, Structural visualization of key steps in human  
694 transcription initiation. *Nature* **495**, 481-486 (2013).
- 695 29. A. Revyakin *et al.*, Transcription initiation by human RNA polymerase II visualized at  
696 single-molecule resolution. *Genes Dev* **26**, 1691-1702 (2012).
- 697 30. Y. He *et al.*, Near-atomic resolution visualization of human transcription promoter  
698 opening. *Nature* **533**, 359-365 (2016).
- 699 31. H. Spahr, G. Calero, D. A. Bushnell, R. D. Kornberg, Schizosaccharomyces pombe RNA  
700 polymerase II at 3.6-A resolution. *Proc Natl Acad Sci U S A* **106**, 9185-9190 (2009).
- 701 32. P. J. Robinson, D. A. Bushnell, M. J. Trnka, A. L. Burlingame, R. D. Kornberg, Structure  
702 of the mediator head module bound to the carboxy-terminal domain of RNA polymerase  
703 II. *Proc Natl Acad Sci U S A* **109**, 17931-17935 (2012).
- 704 33. H. Lu *et al.*, Phase-separation mechanism for C-terminal hyperphosphorylation of RNA  
705 polymerase II. *Nature* **558**, 318-323 (2018).
- 706 34. M. Boehning *et al.*, RNA polymerase II clustering through carboxy-terminal domain  
707 phase separation. *Nat Struct Mol Biol* **25**, 833-840 (2018).
- 708 35. A. B. Patel *et al.*, Structure of human TFIID and mechanism of TBP loading onto  
709 promoter DNA. *Science* **362** (2018).
- 710 36. K. B. Decker, D. M. Hinton, Transcription regulation at the core: similarities among  
711 bacterial, archaeal, and eukaryotic RNA polymerases. *Annu Rev Microbiol* **67**, 113-139  
712 (2013).
- 713 37. X. Liu, D. A. Bushnell, D. Wang, G. Calero, R. D. Kornberg, Structure of an RNA  
714 polymerase II-TFIIB complex and the transcription initiation mechanism. *Science* **327**,  
715 206-209 (2010).
- 716 38. E. Hartenian, S. Gilbertson, J. D. Federspiel, I. M. Cristea, B. A. Glaunsinger, RNA  
717 decay during gammaherpesvirus infection reduces RNA polymerase II occupancy of  
718 host promoters but spares viral promoters. *PLoS Pathog* **16**, e1008269 (2020).
- 719 39. E. Nogales, R. K. Louder, Y. He, Structural Insights into the Eukaryotic Transcription  
720 Initiation Machinery. *Annu Rev Biophys* **46**, 59-83 (2017).
- 721 40. C. Jeronimo, A. R. Bataille, F. Robert, The writers, readers, and functions of the RNA  
722 polymerase II C-terminal domain code. *Chem Rev* **113**, 8491-8522 (2013).
- 723 41. D. Eick, M. Geyer, The RNA polymerase II carboxy-terminal domain (CTD) code. *Chem*  
724 *Rev* **113**, 8456-8490 (2013).
- 725 42. J. Soutourina, Transcription regulation by the Mediator complex. *Nat Rev Mol Cell Biol*  
726 **19**, 262-274 (2018).
- 727 43. T. M. Harper, D. J. Taatjes, The complex structure and function of Mediator. *J Biol Chem*  
728 **293**, 13778-13785 (2018).

- 729 44. C. Plaschka *et al.*, Architecture of the RNA polymerase II-Mediator core initiation  
730 complex. *Nature* **518**, 376-380 (2015).
- 731 45. P. J. Robinson *et al.*, Structure of a Complete Mediator-RNA Polymerase II Pre-Initiation  
732 Complex. *Cell* **166**, 1411-1422 e1416 (2016).
- 733 46. B. L. Allen, D. J. Taatjes, The Mediator complex: a central integrator of transcription. *Nat*  
734 *Rev Mol Cell Biol* **16**, 155-166 (2015).
- 735 47. M. T. Knuesel, K. D. Meyer, C. Bernecky, D. J. Taatjes, The human CDK8 subcomplex  
736 is a molecular switch that controls Mediator coactivator function. *Genes Dev* **23**, 439-451  
737 (2009).
- 738 48. T. Juven-Gershon, S. Cheng, J. T. Kadonaga, Rational design of a super core promoter  
739 that enhances gene expression. *Nat Methods* **3**, 917-922 (2006).
- 740 49. G. C. Lander *et al.*, Appion: an integrated, database-driven pipeline to facilitate EM  
741 image processing. *J Struct Biol* **166**, 95-102 (2009).
- 742 50. N. R. Voss, C. K. Yoshioka, M. Radermacher, C. S. Potter, B. Carragher, DoG Picker  
743 and TiltPicker: software tools to facilitate particle selection in single particle electron  
744 microscopy. *J Struct Biol* **166**, 205-213 (2009).
- 745 51. S. P. Mallick, B. Carragher, C. S. Potter, D. J. Kriegman, ACE: automated CTF  
746 estimation. *Ultramicroscopy* **104**, 8-29 (2005).
- 747 52. J. A. Mindell, N. Grigorieff, Accurate determination of local defocus and specimen tilt in  
748 electron microscopy. *J Struct Biol* **142**, 334-347 (2003).
- 749 53. C. O. Sorzano *et al.*, XMIPP: a new generation of an open-source image processing  
750 package for electron microscopy. *J Struct Biol* **148**, 194-204 (2004).
- 751 54. M. van Heel, G. Harauz, E. V. Orlova, R. Schmidt, M. Schatz, A new generation of the  
752 IMAGIC image processing system. *J Struct Biol* **116**, 17-24 (1996).
- 753 55. S. H. Scheres, RELION: implementation of a Bayesian approach to cryo-EM structure  
754 determination. *J Struct Biol* **180**, 519-530 (2012).
- 755
- 756
- 757
- 758
- 759
- 760
- 761
- 762
- 763
- 764
- 765
- 766
- 767
- 768
- 769
- 770
- 771
- 772
- 773
- 774
- 775
- 776

777 **FIGURES**

778

779

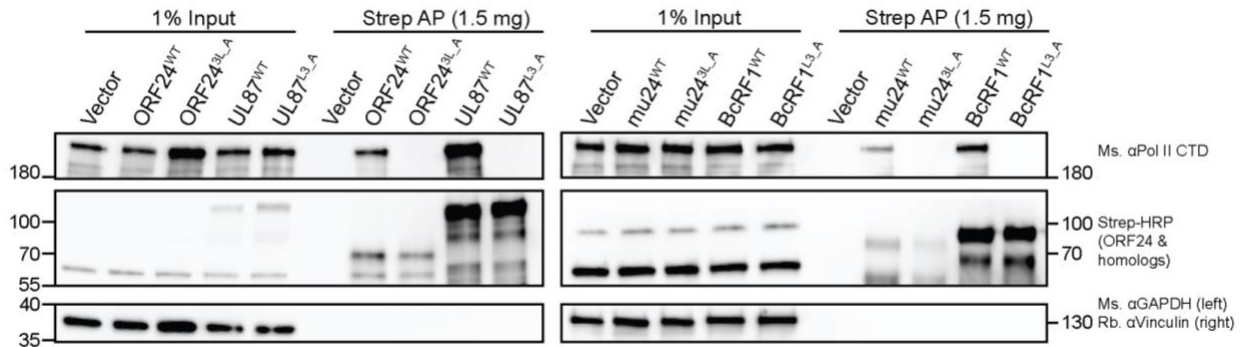

780

781 **Figure 1. The RLLLG motif in ORF24 homologs from other  $\beta$ - and  $\gamma$ -herpesviruses is**  
782 **required for interaction with Pol II.**

783 Full-length WT or 3L\_A mutants, which mutates the conserved RLLLG motif, of Strep-tagged  
784 ORF24 or homologs from MHV68 (mu24), EBV (BcRF1), and HCMV (UL87) were transiently  
785 transfected into HEK293T cells then co-affinity purified with StrepTactinXT beads followed by  
786 western blotting.

787

788

789

790

791

792

793

794

795

796

797

798

799

800

801

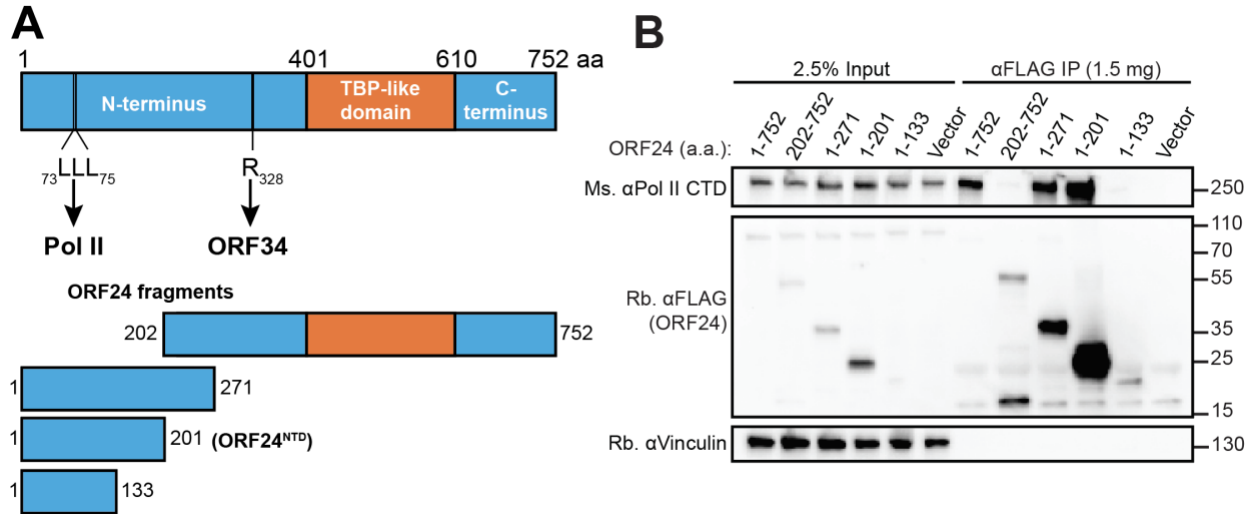

802  
803  
804  
805  
806  
807  
808  
809  
810  
811  
812  
813  
814  
815  
816  
817  
818  
819  
820  
821  
822  
823  
824  
825  
826  
827  
828  
829  
830  
831  
832

**Figure 2. The N-terminal domain of ORF24 (ORF24-NTD) binds Pol II.**

(A) Schematic of constructs used to identify a minimal N-terminal domain of ORF24 showing the predicted boundaries for the N-terminal domain, the TBP-like domain, and the C-terminal domain, including residues known to be required for Pol II binding (amino acids 73-75) and interaction with ORF34 (amino acid 328).

(B) HEK293T cells were transiently transfected with full-length or truncated FLAG-tagged ORF24 and co-immunoprecipitated with anti-FLAG beads followed by western blotting with the indicated antibodies to detect ORF24 and Pol II.

833  
834  
835  
836  
837

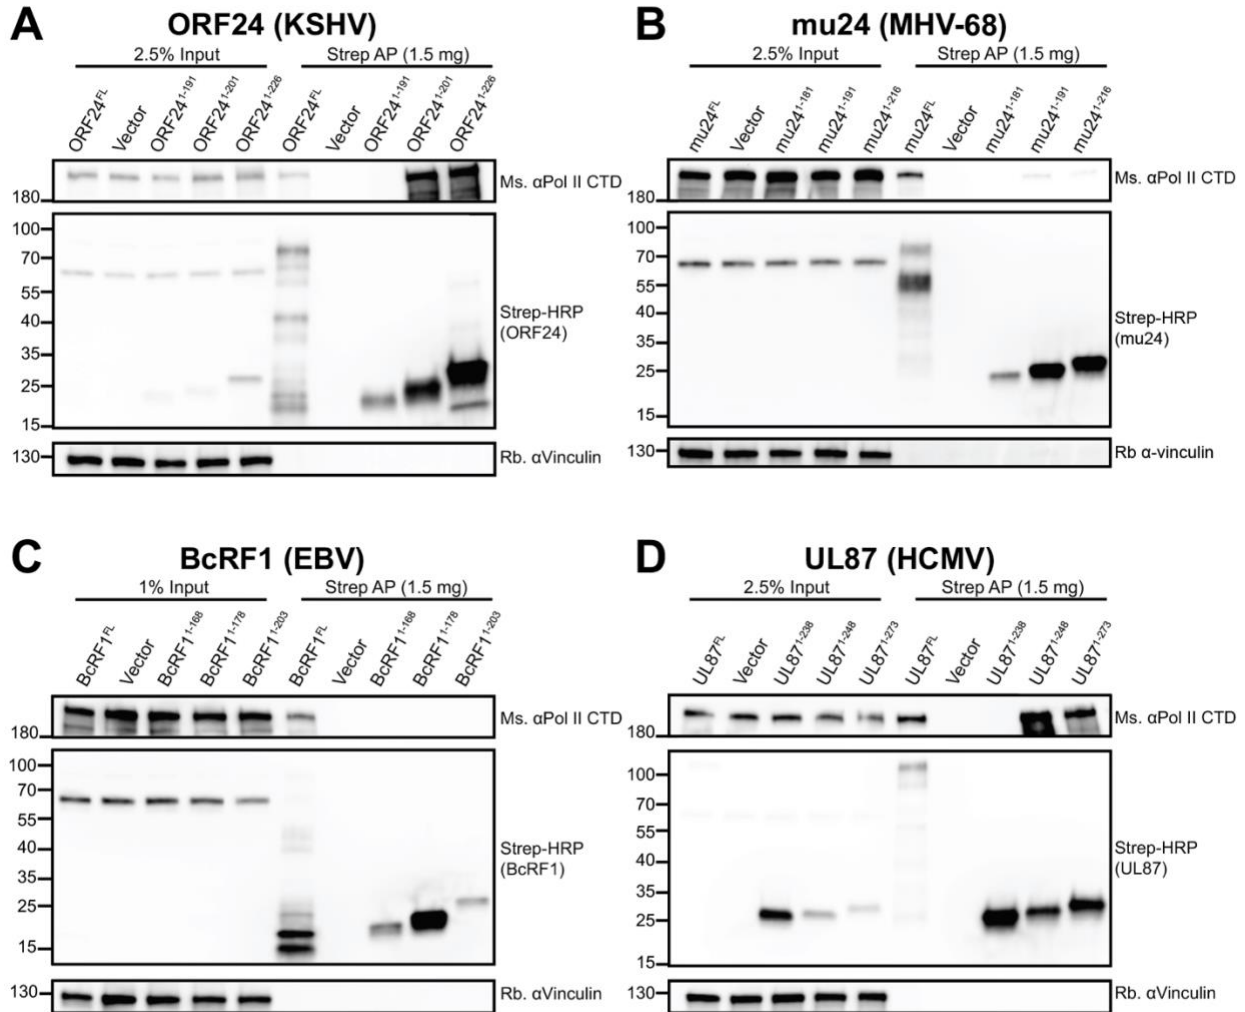

838  
839  
840  
841  
842  
843  
844  
845  
846  
847  
848  
849  
850

**Figure 3. The N-terminal domain of ORF24 homologs from other  $\beta$ - and  $\gamma$ -herpesviruses is sufficient for interaction with Pol II.**

(A-D) Full-length or truncated Strep-tagged constructs of ORF24 (A) or homologs from MHV68 (mu24; B), EBV (BcRF1; C), and HCMV (UL87; D) were transiently transfected into HEK293T cells then co-affinity purified with StrepTactinXT beads followed by western blotting.

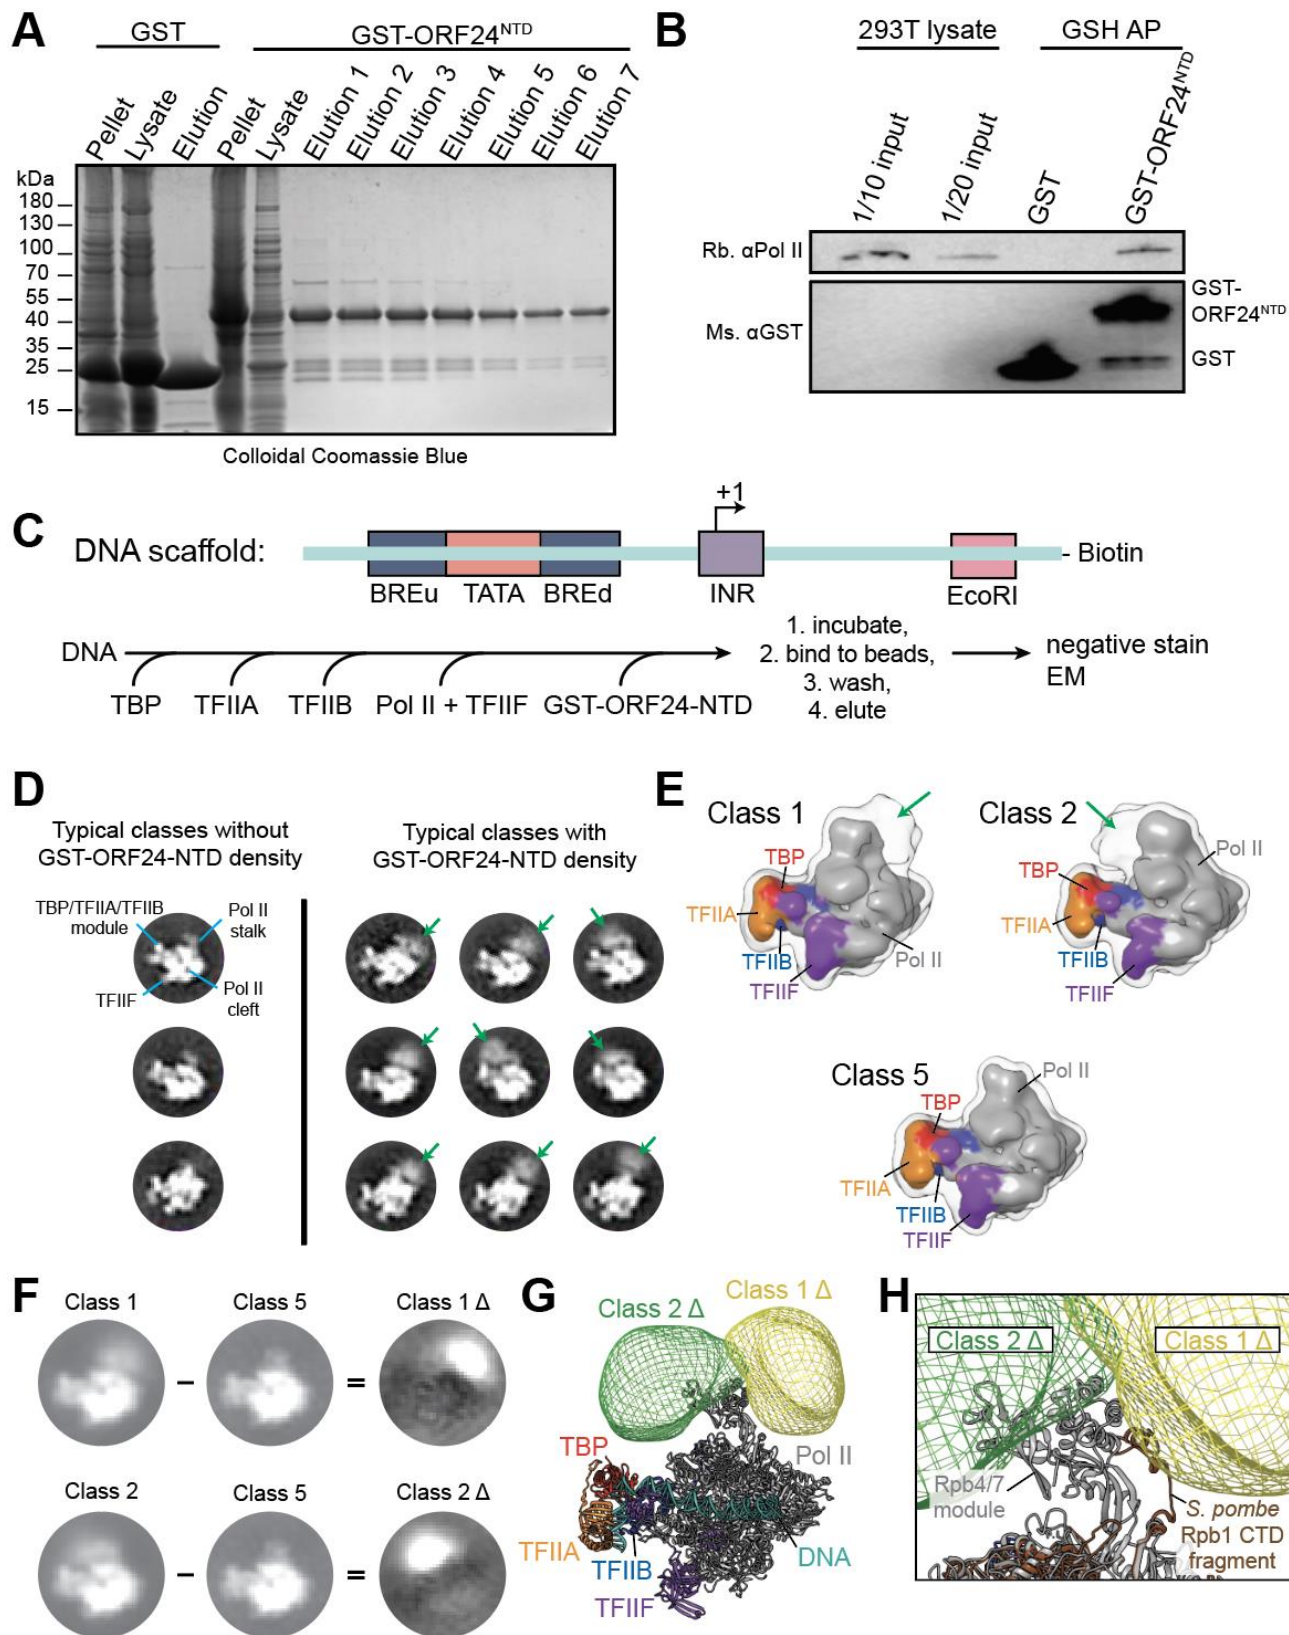

852

853 **Figure 4. ORF24-NTD binds Pol II in minimal PICs.**

854 (A) Colloidal Coomassie gel demonstrating that GST and GST-ORF24-NTD can be  
855 recombinantly expressed in *E. coli* and purified by glutathione sepharose purification.

856 (B) GST or GST-ORF24-NTD was incubated in HEK293T whole cell lysate, then subjected to  
857 affinity purification using glutathione magnetic beads followed by western blotting.

858 (C) Sequential reconstitution strategy for a minimal PIC containing GST-ORF24-NTD.

859 (D) Representative reference-free two-dimensional class averages of negatively stained minimal  
860 PICs (TBP/TFIIA/TFIIB/TFIIF/Pol II/DNA) assembled in the presence of GST-ORF24-NTD.

861 Three classes on the left show different views of the minimal PIC alone, with the class average  
862 in the upper-left annotated with the main features of a minimal PIC particle. The nine class  
863 averages on the right show diffuse density in various positions around the Pol II stalk attributed  
864 to bound GST-ORF24-NTD (green arrows).

865 (E) Representative three-dimensional class averages of negatively stained minimal PICs  
866 assembled in the presence of GST-ORF24-NTD. Classes 1 and 2 exhibit two major areas  
867 occupied by bound GST-ORF24-NTD proximal to the Pol II stalk, while class 5 does not exhibit  
868 any such density near the Pol II stalk. Solid surfaces are colored by subunit, while a lower  
869 intensity iso-surface is shown in transparency to reveal the weaker density attributed to bound  
870 GST-ORF24-NTD (green arrows).

871 (F) Difference mapping of the densities attributed to bound GST-ORF24-NTD. Shown on the left  
872 are two-dimensional projections of class 1 (top) and 2 (bottom) from (E), and on the right are the  
873 difference maps, called "Class 1  $\Delta$ " and "Class 2  $\Delta$ ", calculated by subtracting Class 5 from  
874 each of the respective classes.

875 (G) Three-dimensional difference maps corresponding to the extra density attributed to bound  
876 GST-ORF24-NTD, mapped onto the structure of the minimal PIC (PDB 5IYA).

877 (H) Zoomed in view of (G) with the structure of *Schizosaccharomyces pombe* Rpb1 (PDB  
878 3H0G) superposed onto the human structure to show the location of the beginning portion of the  
879 Rpb1 CTD within the Pol II stalk. Note that only the very N-terminal portion of the Rpb1 CTD is  
880 visible in this structure, with >450 amino acids following this sequence in the CTD of human  
881 Rpb1.

882

883

884

885

886

887

888

889

890

891

892

893

894

895



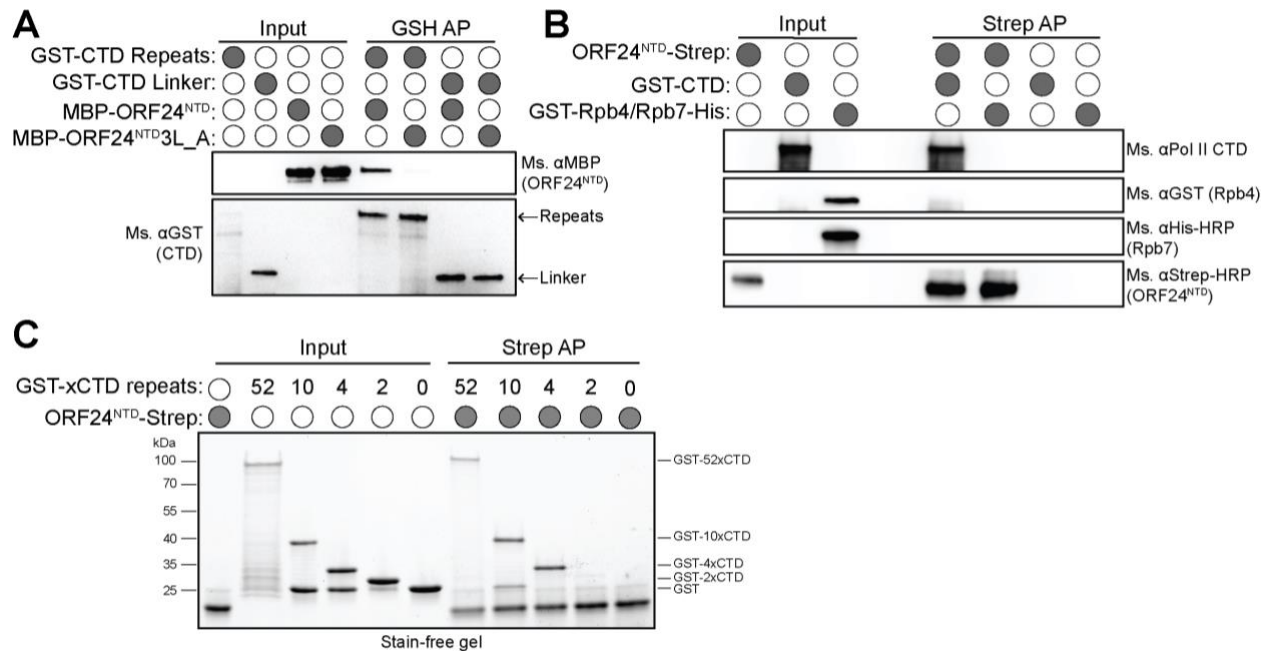

896

897

898 **Figure 5. ORF24-NTD directly interacts with four heptapeptide repeats of the Pol II CTD.**

899 (A) Recombinantly purified GST-CTD repeats or the GST-CTD linker were incubated with either  
 900 purified MBP-ORF24-NTD or MBP-ORF24-NTD-3L\_A protein, then subjected to a glutathione  
 901 pull-down. Samples were resolved by SDS-PAGE and analyzed by western blot.

902 (B) Recombinantly purified GST-CTD repeats or GST-Rpb4/His-Rpb7 heterodimer were  
 903 incubated with recombinantly purified Strep-tagged ORF24-NTD, then subjected to a  
 904 StrepTactinXT pull-down. Samples were resolved by SDS-PAGE and analyzed by western blot.

905 (C) Recombinantly purified full-length GST-CTD repeats (52 repeats) shorter GST-CTD  
 906 constructs (10, 4, or 2 repeats), or GST itself were incubated with recombinantly purified Strep-  
 907 tagged ORF24-NTD, then subjected to a StrepTactinXT pull-down. Samples were resolved by  
 908 SDS-PAGE and stained with colloidal Coomassie.  
 909

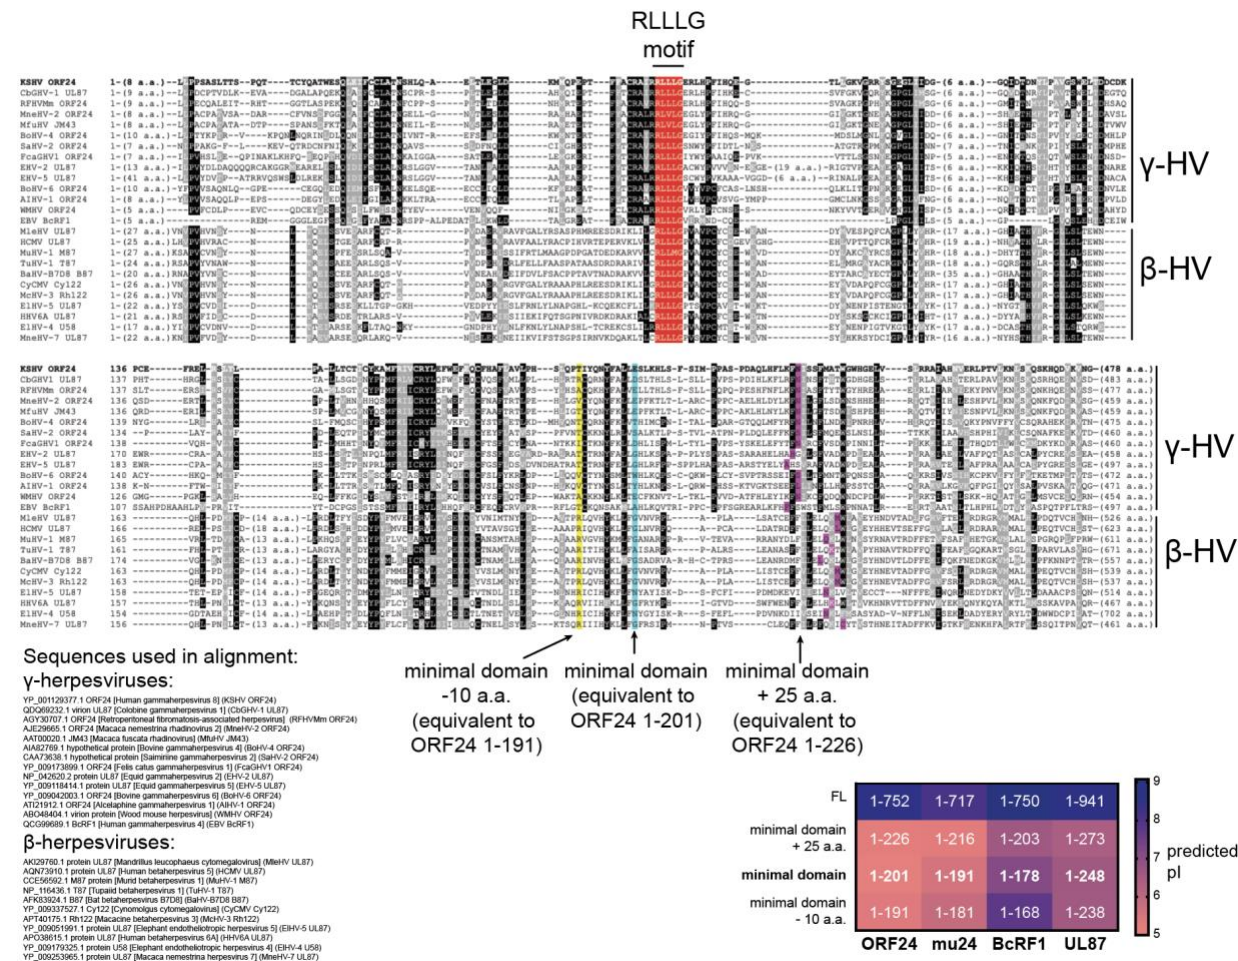

### Supplemental Figure S1.

Multiple sequence alignment of homologs of ORF24 from other β- and γ-herpesviruses. The conserved triple leucine motif is highlighted in red. The location of truncations of the constructs used in Figure 3 are highlighted in yellow, teal, and purple. Sequences used to construct the alignment are listed in the bottom left. The boundaries for the truncated constructs and their relative predicted isoelectric point based on (1) is shown in the bottom right.

910  
911  
912  
913  
914  
915  
916  
917  
918  
919  
920  
921  
922  
923  
924  
925  
926  
927  
928

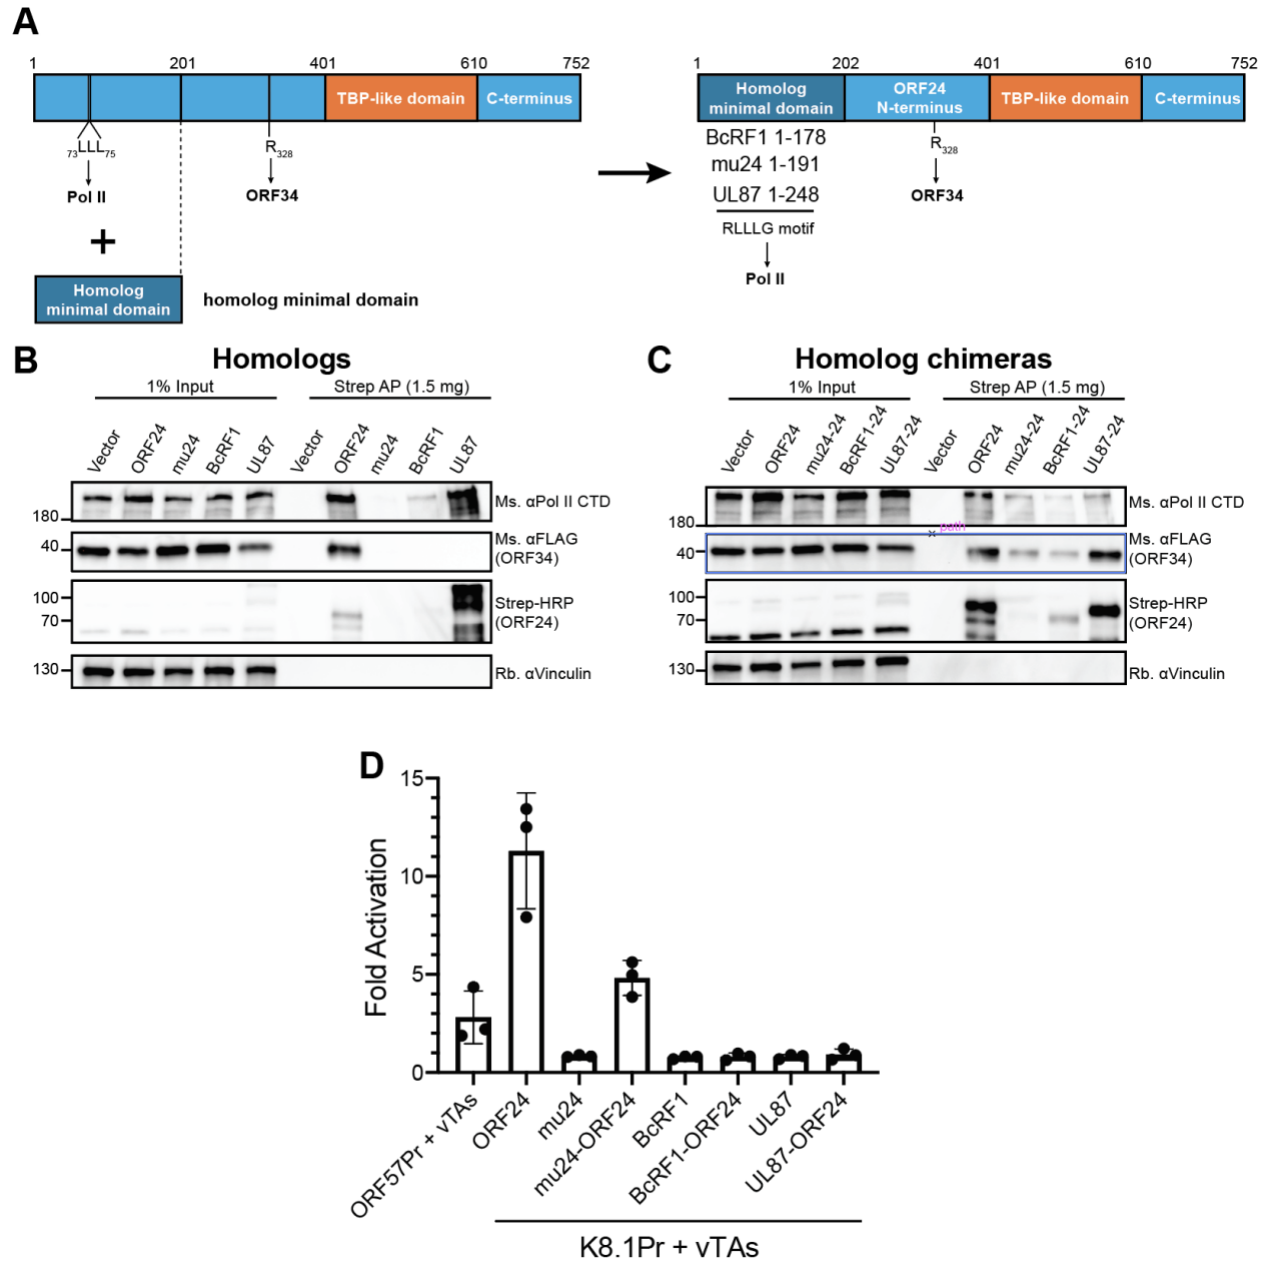

929  
930  
931  
932  
933  
934  
935  
936  
937  
938  
939  
940

941 **Supplemental Figure S2.**

942 (A) Schematic of construct design for ORF24 chimeras. The ORF24-NTD (a.a. 1-201) was  
943 replaced with the experimentally identified minimal domain of mu24, BcRF1, and UL87. These  
944 chimeric constructs retain the N-terminal ORF24-ORF34 interaction region, the ORF24 vTBP  
945 domain, and ORF24 C-terminal tail.

946 (B) Full-length Strep-tagged homologs of ORF24 were transiently transfected into HEK293T  
947 cells along with FLAG-tagged ORF34, then co-affinity purified with StrepTactinXT beads  
948 followed by western blotting.

949 (C) Full-length Strep-tagged chimeras of ORF24 were transiently transfected into HEK293T  
950 cells along with FLAG-tagged ORF34, then co-affinity purified with StrepTactinXT beads  
951 followed by western blotting.

952 (D) HEK293T cells were transiently transfected with a pGL4.16 firefly luciferase plasmid driven  
953 by either the ORF57 (early gene) or K8.1 (late gene) promoter. Plasmids encoding either  
954 ORF24, its homologs, or the chimeras, along with the five remaining KSHV vTAs (ORFs 18, 30,  
955 31, 34, and 66) and a pRL-TK renilla luciferase plasmid (as a transfection control) were also  
956 transfected. After 24 h, cell lysates were harvested and luciferase activity was measured. Fold  
957 activation was calculated by normalizing to the firefly/renilla signal in the absence of vTAs.

958  
959  
960  
961  
962  
963  
964  
965  
966  
967  
968  
969  
970  
971  
972  
973  
974  
975

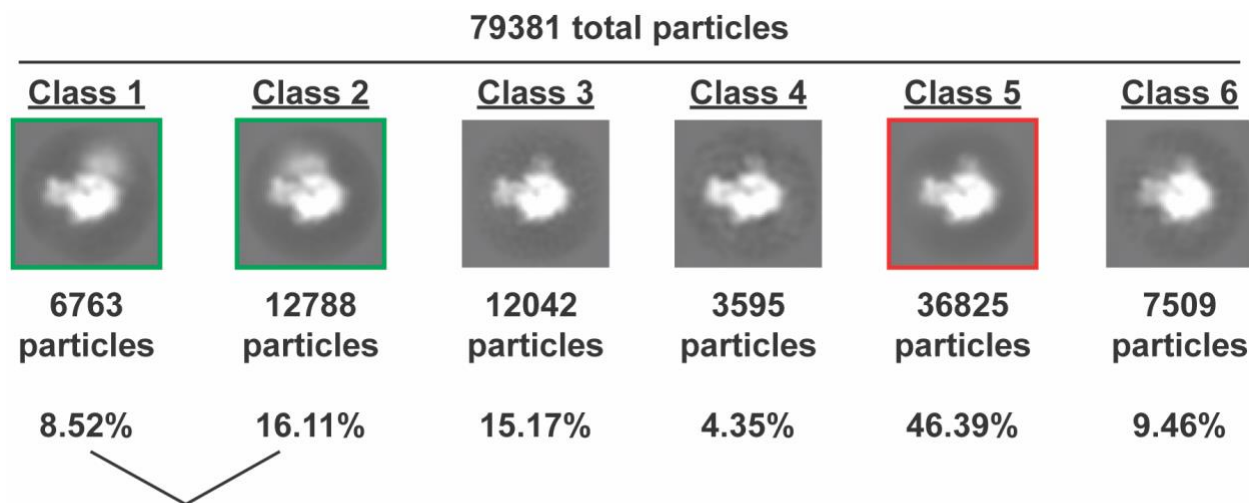

976  
977  
978

**Supplemental Figure S3.**

980 Two-dimensional projections of the three-dimensional classes resulting from sorting the single  
981 particle EM images of negatively stained minimal PICs (TBP/TFIIA/TFIIB/TFIIF/PoI II/DNA)  
982 assembled in the presence of GST-ORF24-NTD. The number of particles assigned to each  
983 class and the percent of total particles are indicated. Classes 1, 2, and 5 were used for the  
984 difference mapping shown in Figure 4.

985  
986  
987  
988  
989  
990  
991  
992  
993  
994  
995  
996  
997  
998  
999  
1000  
1001  
1002  
1003  
1004  
1005

1006 **Table S1. List of oligonucleotides used in this study**

| #  | Name                       | Sequence 5'-3'                                                                                                                | Construct                       |
|----|----------------------------|-------------------------------------------------------------------------------------------------------------------------------|---------------------------------|
| 1  | ORF24 1-133_pCDNA_F        | GCTCGGATCCATGGCAGCGCTCGAGGG                                                                                                   | pCDNA4.TO-ORF24 1-133-CFLAG     |
| 2  | ORF24 1-133_pCDNA_R        | TCGAGCGGCCGCCACAATCATCGGTAAATTCCCATGATC                                                                                       | pCDNA4.TO-ORF24 1-133-CFLAG     |
| 3  | ORF24 1-201_pCDNA_F        | GCTCGGATCCATGGCAGCGCTCGAGGG                                                                                                   | pCDNA4.TO-ORF24 1-201-CFLAG     |
| 4  | ORF24 1-201_pCDNA_R        | TCGAGCGGCCGCCCTCCAGGAGTGCAAAATAATTTTGATAG<br>ATTG                                                                             | pCDNA4.TO-ORF24 1-201-CFLAG     |
| 5  | ORF24 1-271_pCDNA_F        | GCTCGGATCCATGGCAGCGCTCGAGGG                                                                                                   | pCDNA4.TO-ORF24 1-271-CFLAG     |
| 6  | ORF24 1-271_pCDNA_R        | TCGAGCGGCCGCTTCTTGACGTCTGGTGCTTACTCT                                                                                          | pCDNA4.TO-ORF24 1-271-CFLAG     |
| 7  | ORF24 202-752_pCDNA_F      | ATGAGCCTGAAGCATCTCTCG                                                                                                         | pCDNA4.TO-ORF24 202-752-CFLAG   |
| 8  | ORF24 202-752_pCDNA_R      | GGATCCGAGCTCGGTACCAAG                                                                                                         | pCDNA4.TO-ORF24 202-752-CFLAG   |
| 9  | ORF24 1-201_pGEX_F         | GCGTGGATCCATGGCAGCGCTCGAGG                                                                                                    | pGEX4T1-ORF24-NTD               |
| 10 | ORF24 1-201_pGEX_R         | CGATGCGGCCGCTTACTCCAGGAGTGCAAAATAATTTTGATAG<br>ATTGTG                                                                         | pGEX4T1-ORF24-NTD               |
| 11 | ORF24 1-201_pMAL_F         | ATTGAGCTCAATGGCAGCGCTCGAGGG                                                                                                   | pMAL-c2x-ORF24-NTD, WT and ΔLLL |
| 12 | ORF24 1-201_pMAL_R         | TAGAGGATCCTTACTCCAGGAGTGCAAAATAATTTTGATAGATT<br>GT                                                                            | pMAL-c2x-ORF24-NTD, WT and ΔLLL |
| 13 | Rpb1_Linker aa 1460-1585_F | GCGTGGATCCCTGGGCCAGCTGGCTC                                                                                                    | pGEX4T1-Rpb1-linker             |
| 14 | Rpb1_Linker aa 1460-1585_R | CGATGCGGCCGCTGGTGAAGGGATGTAGGGGCT                                                                                             | pGEX4T1-Rpb1-linker             |
| 15 | Rpb4 pGEX4T1_F             | GGTTCGCGTGGATCCATGGCGCGGGTGG                                                                                                  | pGEX4T1-hsRpb4                  |
| 16 | Rpb4 pGEX4T1_R             | GGAATTCGGGGATCTTAATACTGAAAGCTGCGCT                                                                                            | pGEX4T1-hsRpb4                  |
| 17 | Rpb7 pGEX4T1_F             | CCCGGAATTCaggaggTAATTAATatgttctaccatctccctagagcac                                                                             | pGEX4T1-hsRpb4/7                |
| 18 | Rpb7 pGEX4T1_R             | CGATGCGGCCGCTtagtgatggtgatggtgcttacagcccaagtaaatcgt                                                                           | pGEX4T1-hsRpb4/7                |
| 19 | ORF24_2-201_p6H-SUMO3_F    | cagcagacgggaggGCAGCGCTCGAGGGC                                                                                                 | p6H-SUMO3-ORF24-NTD-Strep       |
| 20 | ORF24_2-201_p6H-SUMO3_R    | gacggagctcgaattTATTTTTCAAAGTGGGATGGCTCCACTCCAG<br>GAGTGCAAAATAATTTTGATAGATTG                                                  | p6H-SUMO3-ORF24-NTD-Strep       |
| 21 | 2xCTD_repeat_pQLink_F      | TTATTTTCAGGGATCCTATTCTCCGACCTCTCCATCATAACAGCC<br>CTACTCCCGTCCCTAGGCGGCCGCTAGGACCC                                             | pQLink-GST-2xCTD                |
| 22 | 2xCTD_repeat_pQLink_R      | GGGTCTAGGCGGCCGCTAGGACGGGAGGTAGGGCTGTA<br>TGATGGAGAGGTCGGGAATAGGATCCCTGAAAATAA                                                | pQLink-GST-2xCTD                |
| 23 | 4xCTD_repeat_pQLink_F      | TTATTTTCAGGGATCCTATAGCCACGACGCCCTTCTTACTCT<br>CCGACCTCACCATCCTATTGCGCTACTAGCCGAGTTACAGTC<br>CCACATCTCCGTCCTAGGCGGCCGCTAGGACCC | pQLink-GST-4xCTD                |
| 24 | 4xCTD_repeat_pQLink_R      | GGGTCTAGGCGGCCGCTAGGACGGAGATGTGGGACTGTA<br>ACTCGGGCTAGTAGGCAATAGGATGGTGGAGTGGGAGAGTA<br>AGAAGGGCTCGTGGGGCTATAGGATCCCTGAAAATAA | pQLink-GST-4xCTD                |
| 24 | ORF24_F                    | TACCGAGCTCGGATCCATGGCAGCGCTCGAGGGC                                                                                            | pCDNA4.TO-ORF24 3L_A-CSTREP     |
| 25 | ORF24_R                    | caccgctcctcaggagcCAGCGGACG                                                                                                    | pCDNA4.TO-ORF24 3L_A-CSTREP     |
| 26 | BcRF1_F                    | TACCGAGCTCGGATCCATGACACAAGGTAAGAGGGAGATGG                                                                                     | pCDNA4.TO-BcRF1-CSTREP          |
| 27 | BcRF1_R                    | CACCGCTCCCTCGAGCACTTGGATCAGCGCAGTGG                                                                                           | pCDNA4.TO-BcRF1-CSTREP          |
| 28 | BcRF1 (3L_A)_F             | GCCGCGCAGggcgttatccgaataaagtgcaggag                                                                                           | pCDNA4.TO-BcRF1 3L_A-CSTREP     |
| 29 | BcRF1 (3L_A)_R             | acgacgcatagccgacacgcgtaaaaggtg                                                                                                | pCDNA4.TO-BcRF1 3L_A-CSTREP     |
| 30 | mu24_F                     | TACCGAGCTCGGATCCATGACAAATTTCTTACCAGTATTCTGT<br>GATTTGC                                                                        | pCDNA4.TO-mu24-CSTREP           |
| 31 | mu24_R                     | CTCCTCGAGCGGCCGCCGAGTCTGGTTGGCAAGG                                                                                            | pCDNA4.TO-mu24-CSTREP           |
| 32 | mu24 (3L_A)_F              | GCCGCGCAGgataagactgtaccacactgcaataactg                                                                                        | pCDNA4.TO-mu24 3L_A-CSTREP      |
| 33 | mu24 (3L_A)_R              | tccttaagctctacataaacaagaatgt                                                                                                  | pCDNA4.TO-mu24 3L_A-CSTREP      |
| 34 | UL87_F                     | AAAAGAATTCATGGCCGGCGCTGC                                                                                                      | pCDNA4.TO-UL87-CSTREP           |
| 35 | UL87_R                     | AAAACCTCGAGTCGTGATGCAAACCGCAC                                                                                                 | pCDNA4.TO-UL87-CSTREP           |
| 36 | UL87 (3L_A)_F              | GCCGCGCAGGACCCGTGGCCGTACCCTGTTTTTGCGAC                                                                                        | pCDNA4.TO-UL87 3L_A-CSTREP      |
| 37 | UL87 (3L_A)_R              | ACGACCCAGTACCAGCTTGACACGCTCGGA                                                                                                | pCDNA4.TO-UL87 3L_A-CSTREP      |
| 38 | ORF24_1-191_pCDNA_F        | TACCGAGCTCGGATCCATGGCAGCGCTCGAGGGC                                                                                            | pCDNA4.TO-ORF24 1-191-CSTREP    |
| 39 | ORF24_1-191_pCDNA_R        | CACCGCTCCCTCGAGTGTGGTGTGACTATGGGGC                                                                                            | pCDNA4.TO-ORF24 1-191-CSTREP    |
| 40 | ORF24_1-201_pCDNA_F        | TACCGAGCTCGGATCCATGGCAGCGCTCGAGGGC                                                                                            | pCDNA4.TO-ORF24 1-201-CSTREP    |
| 41 | ORF24_1-201_pCDNA_R        | CACCGCTCCCTCGAGTGGCAGGAGTGCAAAATAATTTTG                                                                                       | pCDNA4.TO-ORF24 1-201-CSTREP    |
| 42 | ORF24_1-226_pCDNA_F        | TACCGAGCTCGGATCCATGGCAGCGCTCGAGGGC                                                                                            | pCDNA4.TO-ORF24 1-226-CSTREP    |
| 43 | ORF24_1-226_pCDNA_R        | CACCGCTCCCTCGAGGTTAAACTTTAAAAAATGTAGC                                                                                         | pCDNA4.TO-ORF24 1-226-CSTREP    |
| 44 | BcRF1_1-168_pCDNA_F        | TACCGAGCTCGGATCCATGACACAAGGTAAGAGGGAGATGG                                                                                     | pCDNA4.TO-BcRF1 1-168-CSTREP    |
| 45 | BcRF1_1-168_pCDNA_R        | CACCGCTCCCTCGAGGTTCCCTAGGAAGCGACGC                                                                                            | pCDNA4.TO-BcRF1 1-168-CSTREP    |

|    |                     |                                           |                              |
|----|---------------------|-------------------------------------------|------------------------------|
| 46 | BcRF1_1-178_pCDNA_F | TACCGAGCTCGGATCCATGACACAAGGTAAGAGGGAGATGG | pCDNA4.TO-BcRF1 1-178-CSTREP |
| 47 | BcRF1_1-178_pCDNA_R | CACCGCCTCCCTCGAGAGCCAGCATCTTTGCAGAGTTTTGC | pCDNA4.TO-BcRF1 1-178-CSTREP |
| 48 | BcRF1_1-203_pCDNA_F | TACCGAGCTCGGATCCATGACACAAGGTAAGAGGGAGATGG | pCDNA4.TO-BcRF1 1-203-CSTREP |
| 49 | BcRF1_1-203_pCDNA_R | CACCGCCTCCCTCGAGGAAGTGAACCTTGAGTCTGGCC    | pCDNA4.TO-BcRF1 1-203-CSTREP |
| 50 | mu24_1-181_pCDNA_F  | TACCGAGCTCGGATCCATGACAATATTCTTACCAGTATTC  | pCDNA4.TO-mu24 1-181-CSTREP  |
| 51 | mu24_1-181_pCDNA_R  | CACCGCCTCCCTCGAGAGCAGACCTGGCCAGGG         | pCDNA4.TO-mu24 1-181-CSTREP  |
| 52 | mu24_1-191_pCDNA_F  | TACCGAGCTCGGATCCATGACAATATTCTTACCAGTATTC  | pCDNA4.TO-mu24 1-191-CSTREP  |
| 53 | mu24_1-191_pCDNA_R  | CACCGCCTCCCTCGAGCTCAGTAAGCTTCAAGTAATTTTT  | pCDNA4.TO-mu24 1-191-CSTREP  |
| 54 | mu24_1-216_pCDNA_F  | TACCGAGCTCGGATCCATGACAATATTCTTACCAGTATTC  | pCDNA4.TO-mu24 1-216-CSTREP  |
| 55 | mu24_1-216_pCDNA_R  | CACCGCCTCCCTCGAGATTGAATTTGATATATTTCAAATGA | pCDNA4.TO-mu24 1-216-CSTREP  |
| 56 | UL87_1-238_pCDNA_F  | TACCGAGCTCGGATCCATGGCCGGCGCTGCGCCG        | pCDNA4.TO-UL87 1-238-CSTREP  |
| 57 | UL87_1-238_pCDNA_R  | CACCGCCTCCCTCGAGGCGCGCGCGCGGCCTCG         | pCDNA4.TO-UL87 1-238-CSTREP  |
| 58 | UL87_1-248_pCDNA_F  | TACCGAGCTCGGATCCATGGCCGGCGCTGCGCCG        | pCDNA4.TO-UL87 1-248-CSTREP  |
| 59 | UL87_1-248_pCDNA_R  | CACCGCCTCCCTCGAGTCCAAAGAGCAGCTTGTAGTGAACC | pCDNA4.TO-UL87 1-248-CSTREP  |
| 60 | UL87_1-273_pCDNA_F  | TACCGAGCTCGGATCCATGGCCGGCGCTGCGCCG        | pCDNA4.TO-UL87 1-273-CSTREP  |
| 61 | UL87_1-273_pCDNA_R  | CACCGCCTCCCTCGAGAAGCTTTTGCAGCTCCAGC       | pCDNA4.TO-UL87 1-273-CSTREP  |
| 62 | BcRF1-ORF24_1_F     | TACCGAGCTCGGATCCATGACACAAGGTAAGAGGGAGATGG | pCDNA4.TO-BcRF1-ORF24-CSTREP |
| 63 | BcRF1-ORF24_1_R     | TTCAGGCTagccagcatctttgc                   | pCDNA4.TO-BcRF1-ORF24-CSTREP |
| 64 | BcRF1-ORF24_2_F     | gctggctAGCCTGAAGCATC                      | pCDNA4.TO-BcRF1-ORF24-CSTREP |
| 65 | BcRF1-ORF24_2_R     | CACCGCCTCCCTCGAGCAGCGGACGGACGCAACG        | pCDNA4.TO-BcRF1-ORF24-CSTREP |
| 66 | mu24-ORF24_1_F      | TACCGAGCTCGGATCCATGACAATATTCTTACCAGTATTC  | pCDNA4.TO-mu24-ORF24-CSTREP  |
| 67 | mu24-ORF24_1_R      | TTCAGGCTctcagtaagctcaagtaat               | pCDNA4.TO-mu24-ORF24-CSTREP  |
| 68 | mu24-ORF24_2_F      | tactgagAGCCTGAAGCATCTCT                   | pCDNA4.TO-mu24-ORF24-CSTREP  |
| 69 | mu24-ORF24_2_R      | CACCGCCTCCCTCGAGCAGCGGACGGACGCAACG        | pCDNA4.TO-mu24-ORF24-CSTREP  |
| 70 | UL87-ORF24_1_F      | TACCGAGCTCGGATCCATGGCCGGCGCTGCGCCG        | pCDNA4.TO-UL87-ORF24-CSTREP  |
| 71 | UL87-ORF24_1_R      | TTCAGGCTtccaagagcagct                     | pCDNA4.TO-UL87-ORF24-CSTREP  |
| 72 | UL87-ORF24_2_F      | AGCCTGAAGCATCTCTCGTTTTCAAT                | pCDNA4.TO-UL87-ORF24-CSTREP  |
| 73 | UL87-ORF24_2_R      | CACCGCCTCCCTCGAGCAGCGGACGGACGCAACG        | pCDNA4.TO-UL87-ORF24-CSTREP  |

1007  
 1008  
 1009  
 1010  
 1011  
 1012  
 1013  
 1014  
 1015  
 1016  
 1017  
 1018  
 1019  
 1020  
 1021  
 1022  
 1023  
 1024  
 1025  
 1026  
 1027  
 1028  
 1029  
 1030

1031 **Table S2. Nucleotide sequence of synthetic gene blocks used in this study.**

| Geneblock Name                  | Sequence 5'-3'                                                                                                                                                                                                                                                          | Construct         |
|---------------------------------|-------------------------------------------------------------------------------------------------------------------------------------------------------------------------------------------------------------------------------------------------------------------------|-------------------|
| 10xCTD_repeat_pQLink_inse<br>rt | TTATTTTCAGGGATCCTATAGCCCGACGTCGCCGAGTTATTCACCTA<br>CGTCCCCATCATACTCCCCACGAGCCCTAGTTATTCGCCAACTTC<br>CCCGAGCTATTCCCAACATCACCCAGCTATAGTCCCACTTCACCC<br>TCCTATTCACCTACGAGTCCATCTTATTCTCCAACCAGTCCTTCGTA<br>CTCACCCACGTCCCCATCGTATTCTCCTACTTCCCCTAGCTAGGCG<br>GCCGCTAGGACCC | pQLink-GST-10xCTD |

1032  
1033  
1034  
1035  
1036  
1037  
1038  
1039  
1040  
1041  
1042  
1043  
1044  
1045  
1046  
1047  
1048  
1049  
1050  
1051  
1052  
1053  
1054  
1055  
1056  
1057  
1058  
1059  
1060  
1061  
1062  
1063  
1064  
1065  
1066  
1067  
1068



1069 **Supplemental References**

1070 1. L. P. Kozlowski, IPC - Isoelectric Point Calculator. *Biol Direct* **11**, 55 (2016).

1071

1072

1073

1074

1075

1076

1077

1078

1079

1080

1081

1082

1083

1084

1085

1086

1087

1088

1089

1090
